# Supplementary material
Source: PubMed Central journal article supplement (PMC5143022)
Supplement: supp_4.3.E404_2015-0092_Original_submission.pdf [file supp_4.3.E404_2015-0092_Original_submission.pdf]

1  
2  
3  
4  
5  
6  
7  
8  
9  
10  
11  
12  
13  
14  
15  
16  
17  
18  
19  
20  
21  
22  
23  
24  
25  
26  
27  
28  
29  
30  
31  
32  
33  
34  
35  
36  
37  
38  
39  
40  
41  
42  
43  
44  
45  
46  
47  
48  
49  
50  
51  
52  
53  
54  
55  
56  
57  
58  
59  
60

Confidential

A cost-analysis comparing surgical trays with redundant instruments to reduced trays

John-Baptiste A, Sowerby LJ, Chin CJ, Martin J, Rotenberg BW

Abstract word count: 245

Body word count: 2,731

## Abstract

**Background:** When pre-arranged standard surgical trays contain instruments that are repeatedly unused, the redundancy can result in unnecessary health care costs. Our objective was to estimate potential savings by performing an economic evaluation comparing the cost of surgical trays with redundant instruments to reduced surgical trays.

**Methods:** We performed a cost-analysis, from the hospital perspective over a 1-year time horizon. Using a mathematical model we compared the direct costs of trays containing redundant instruments to reduced trays for five otolaryngology procedures. We incorporated data from several sources including local hospital data on surgical volume, the number of instruments on redundant and reduced trays, wages of personnel and time required to pack instruments. From the literature we incorporated instrument depreciation costs and the time required to decontaminate an instrument. We performed one-way sensitivity analysis on all variables, including surgical volume. Costs were estimated in 2013 Canadian dollars.

**Results:** The cost of redundant trays was \$21,806 and the cost of reduced trays was \$8,803, for a one-year cost saving of \$13,003. In sensitivity analysis, cost savings ranged from \$3,262 to \$21,395, based on the surgical volume at our institution. Variation in surgical volume resulted in a wider range of estimates, with a minimum of \$3,253 for low volume, to a maximum of \$52,012 for high volume institutions.

**Conclusions:** Our study indicates moderate savings may be achieved by reducing surgical tray redundancy and if applied to other surgical specialties, may result in savings to Canadian health care systems.

## Background

In 2015, total health care expenditures in Canada were estimated at \$219 billion.[1]

Although hospitals represented the largest category of expenditures at 29.5%, this proportion has been steadily decreasing over the last 2 decades. The decline is due in part to provincial and territorial policies to promote cost cutting in hospitals. In Ontario, activity-based funding in the form of Health-Based Allocation Models (HBAM) has been implemented to promote quality care and incentivize increased efficiency.[2,3] Similar funding initiatives have previously been implemented in British Columbia and Alberta.[4] As a result, hospitals are keen to identify areas of potential cost savings.

Surgical tray redundancy is recognized as a potential difficulty in surgical units. [5-8] At one hospital, a review of 49 procedures and 247 trays within four surgical specialties (Otolaryngology, Plastic Surgery, Bariatric Surgery and Neurosurgery) demonstrated that rates of instrument use varied from 13.0% to 21.9%.[7] After surgery, sterile processing personnel decontaminate instruments through manual cleaning. Personnel assemble standardized trays by packing instruments onto trays, which are then washed and sterilized in a washer-disinfector machine for the next surgical procedure. Since all instruments in an opened tray require sterile processing, unused instruments incur potentially avoidable costs. In a previous study, we conducted a review of instruments on surgical trays in the Otolaryngology departments of St. Joseph's Healthcare London (SJHC) and the London Health Sciences Centre.[9] We found that the average tray utilization ranged from 20.14% to 51.67%, suggesting significant redundancy. We have proposed

1  
2  
3 streamlined trays that would reduce the number of instruments by more than 50%. In this  
4  
5 study, our objective was to perform an economic evaluation of streamlined trays in order  
6  
7 to quantify the potential cost savings that may result from implementing the new, smaller  
8  
9 trays.  
10  
11

## 12 13 14 15 **Methods**

16  
17  
18  
19  
20 We conducted a model-based economic evaluation comparing redundant trays to reduced  
21  
22 trays. We performed a cost-analysis for five common otolaryngology surgical procedures  
23  
24 (septoplasty, septorhinoplasty, skin cancer excision, endoscopic sinus surgery (ESS), and  
25  
26 tonsillectomy). The analysis was performed from the hospital perspective and incorporates  
27  
28 the costs incurred by the hospital in sterile processing of surgical trays. The model  
29  
30 estimated costs as a function of the number of instruments on the tray, the number of  
31  
32 surgical procedures, the per instrument decontamination and packing times, personnel  
33  
34 time costs and the per instrument depreciation cost.  
35  
36  
37  
38  
39  
40  
41

$$42 \text{ Cost}_{\text{tray}} = (n_{\text{procedures}} * n_{\text{instruments}}) * ((\text{cost}_{\text{time}} (\text{time}_{\text{decontamination}} + \text{time}_{\text{pack}}) + \text{cost}_{\text{depreciation}})$$

43  
44  
45  
46  
47  
48

## 49 **Data sources**

50  
51  
52  
53 We incorporated data from several sources into the model. We used local hospital data  
54  
55 from two tertiary care academic hospitals, the London Health Sciences (LHSC) Centre and  
56  
57  
58  
59  
60



1  
2  
3 St. Joseph's Health Care (SJHC), in Ontario, Canada. For the five otolaryngology procedures,  
4 we obtained 2013 hospital data on surgical volumes. (Table 1) We incorporated data on the  
5 number and composition of extant trays and proposed reduced trays comprised of fewer,  
6 more frequently utilized instruments, based on findings from our earlier review of tray  
7 utilization.[9] (Table 1) The details of extant and reduced tray composition are provided in  
8 Appendix A.  
9  
10  
11  
12  
13  
14  
15  
16  
17  
18  
19

20 To estimate the time to pack instruments during tray assembly, we obtained routinely  
21 collected data from the hospital central processing (CP) unit at the London Health Sciences  
22 Centre, London, Ontario on the time to assemble otolaryngology trays between January 1,  
23 2013 and December 31, 2013. The dataset represented 173 trays, with a total of 9445  
24 assemblies, and provided the average packing time per tray across all surgical procedures.  
25 To obtain a sample representative of the five tray categories of interest, we selected tray  
26 categories with a minimum of 10 instruments, and a minimum of 10 repeated assemblies.  
27 Of a total of 173 trays, 39 met these inclusion criteria, representing 4,541 assemblies. For  
28 each of 39 trays, we divided the total number of instruments per tray by the average tray  
29 assembly time to calculate a mean per instrument packing time (17.5s) and incorporated  
30 the 2.5 and 97.5 percentiles of the per instrument packing time as the extreme ends of the  
31 range for sensitivity analysis (7.6s, 31.6s). From the human resources department we  
32 obtained the mean wage rates of central processing personnel (\$21.50 (2013 CAD) per  
33 hour), along with the minimum and maximum wage rates (\$21.00, \$22.00 (2013 CAD) per  
34 hour). We calculated a per second wage rate by dividing hourly rates by 3600. (Table 2)  
35  
36  
37  
38  
39  
40  
41  
42  
43  
44  
45  
46  
47  
48  
49  
50  
51  
52  
53  
54  
55  
56  
57  
58  
59  
60

1  
2  
3 Since routinely collected data on decontamination times and per instrument depreciation  
4 costs were not available from the local hospitals, we conducted a review of the literature to  
5 identify studies with relevant information. We incorporated a decontamination time of  
6 4.02s per instrument estimated at the University of Chicago Medicine Hospitals using data  
7 from 61 trays.[7] We incorporated a minimum and maximum decontamination time for  
8 trays with more than 10 instruments from this study. [7] Minimum and maximum  
9 decontamination times were 1.07s (15s, 14 instruments) and 13.64s (22s, 300  
10 instruments) per instrument, respectively. From the literature, we incorporated a mean  
11 per instrument depreciation cost of 0.06 USD (minimum \$0.02 USD, maximum \$0.18 USD)  
12 that had been calculated by dividing instrument purchase prices by their estimated  
13 lifespans.[7] We used the purchasing power parity for health of 1.0206 to convert US  
14 Dollars to Canadian dollars.[10] The Purchasing Power Parity for health is an exchange rate  
15 estimated by comparing the price of a standard package of health-related goods and  
16 services, including hospital services, between two countries.  
17  
18  
19  
20  
21  
22  
23  
24  
25  
26  
27  
28  
29  
30  
31  
32  
33  
34  
35  
36  
37  
38  
39  
40  
41  
42  
43  
44  
45  
46  
47  
48

49 In order to compare our estimates with others from the literature, we estimated a per  
50 instrument labour cost by adding the per instrument decontamination and packing times  
51 and multiplying by the per second labour cost.[7]  
52  
53  
54  
55  
56  
57  
58  
59  
60

### Sensitivity Analysis

We performed a series of one-way sensitivity analyses. We varied each parameter across its plausible range, with the other parameters set to their base case values. In this way, we

1  
2  
3 characterized minimum and maximum cost savings for the range of each input parameter.  
4  
5 We varied the reduction in tray size from 25% to 110%, corresponding to less reduction in  
6  
7 tray size and greater reduction, respectively. We also, varied the surgical volume between  
8  
9 25% and 400%, corresponding to a low and high surgical volume, respectively. The  
10  
11 surgical volume at our institution does not vary to a great extent. Sensitivity analysis on  
12  
13 surgical volume is however pertinent to the external generalizability of our estimates to  
14  
15 other institutions.  
16  
17  
18  
19  
20

21  
22 A complete list of input parameters, ranges and sources is provided in Table 2.  
23  
24  
25  
26

### 27 Scenario Analysis

28  
29  
30  
31

32 In the study conducted at the University of Chicago Medicine Hospitals, investigators  
33  
34 estimated indirect cost savings from reduced trays for 49 procedures, spanning four  
35  
36 surgical services (otolaryngology, plastic surgery, bariatric surgery and neurology).  
37  
38 Indirect cost savings were estimated by allocating the operating costs of the sterile  
39  
40 processing unit to each instrument to account for decreases in utilities, reagents, quality  
41  
42 checks and equipment maintenance.[7] We incorporated these additional cost savings into  
43  
44 a scenario analysis, rather than the base case analysis, due to concerns that reductions in  
45  
46 indirect cost are sensitive to scale. In our hospital, reagents for the washer-disinfector are  
47  
48 used in standard aliquots irrespective of the number of surgical trays or the number of  
49  
50 instruments in the machine. Reducing trays for five surgical procedures would not likely  
51  
52 result in fewer cycles of operation for the washer-disinfector and thus significant savings  
53  
54  
55  
56  
57  
58  
59  
60

1  
2  
3 from utilities, reagents and equipment repair and maintenance would not likely be realized.

4  
5 In the scenario analysis we incorporated a per instrument indirect cost of \$0.23 USD by  
6  
7  
8 converting to Canadian dollars using the purchasing power parity.[7,10] (Table 2)  
9  
10

11  
12  
13 Costs were estimated in 2013 Canadian dollars, from the hospital perspective, over a one-  
14  
15 year time horizon. A one-year time horizon is sufficient to demonstrate potential cost  
16  
17 savings. As a result, no discount rate was applied.  
18  
19  
20  
21  
22  
23  
24  
25  
26  
27  
28  
29  
30  
31  
32  
33  
34  
35  
36  
37  
38  
39  
40  
41  
42  
43  
44  
45  
46  
47  
48  
49  
50  
51  
52  
53  
54  
55  
56  
57  
58  
59  
60

Confidential

## Results

In the base case analysis, the estimated annual cost of redundant trays at LHSC and SJHC for the five procedures was \$21,806 (2013 CAD) and the annual cost of reduced trays is expected to be \$8,803 (2013 CAD). Our analysis suggests that if we implemented the proposed tray reduction at our institution, based on the number of procedures performed in 2013, we may have saved \$13,003 (2013 CAD) in that year. Our base case per instrument labour cost was \$0.13 (2013 CAD).

Based on the surgical volume at our own institution, the extent of tray reduction was an important factor in the cost-saving estimates. One-way sensitivity analysis suggested that removing fewer instruments from the tray at 25% of the base case reduction would result in a cost saving of \$3,262 (2013 CAD), whereas removing 10% more than the base case would result in a cost saving of \$14,300. The per instrument packing time was also an important factor. In one-way sensitivity analysis, the estimated cost savings ranged from \$8,951 to \$18,773 (2013 CAD), over the plausible range of per instrument packing time.

Variation in surgical volume was associated with the largest variation in cost savings estimates. With all other parameters remaining the same, an institution performing  $\frac{1}{4}$  of the volume would save \$3,253 (2013 CAD). An institution performing four times the surgical volume would save \$52,012 per year (2013 CAD).

1  
2  
3 In a scenario analysis that incorporated indirect cost savings, the cost of redundant trays  
4 was \$48,781 (2013 CAD), the cost of reduced trays \$19,692 (2013 CAD), and the estimated  
5  
6  
7  
8  
9 cost savings, \$29,088 (2013 CAD) per year.

## 10 11 12 13 **Interpretation**

### 14 15 16 17 18 **Main Findings**

19  
20 Our analysis suggests cost savings of \$13,003 (2013 CAD) per year can be achieved by  
21  
22 reducing surgical trays for five otolaryngology procedures. In sensitivity analysis, the  
23  
24  
25  
26  
27  
28  
29  
30  
31  
32  
33  
34  
35  
36  
37  
38  
39  
40  
41  
42  
43  
44  
45  
46  
47  
48  
49  
50  
51  
52  
53  
54  
55  
56  
57  
58  
59  
60  
61  
62  
63  
64  
65  
66  
67  
68  
69  
70  
71  
72  
73  
74  
75  
76  
77  
78  
79  
80  
81  
82  
83  
84  
85  
86  
87  
88  
89  
90  
91  
92  
93  
94  
95  
96  
97  
98  
99  
100  
101  
102  
103  
104  
105  
106  
107  
108  
109  
110  
111  
112  
113  
114  
115  
116  
117  
118  
119  
120  
121  
122  
123  
124  
125  
126  
127  
128  
129  
130  
131  
132  
133  
134  
135  
136  
137  
138  
139  
140  
141  
142  
143  
144  
145  
146  
147  
148  
149  
150  
151  
152  
153  
154  
155  
156  
157  
158  
159  
160  
161  
162  
163  
164  
165  
166  
167  
168  
169  
170  
171  
172  
173  
174  
175  
176  
177  
178  
179  
180  
181  
182  
183  
184  
185  
186  
187  
188  
189  
190  
191  
192  
193  
194  
195  
196  
197  
198  
199  
200  
201  
202  
203  
204  
205  
206  
207  
208  
209  
210  
211  
212  
213  
214  
215  
216  
217  
218  
219  
220  
221  
222  
223  
224  
225  
226  
227  
228  
229  
230  
231  
232  
233  
234  
235  
236  
237  
238  
239  
240  
241  
242  
243  
244  
245  
246  
247  
248  
249  
250  
251  
252  
253  
254  
255  
256  
257  
258  
259  
260  
261  
262  
263  
264  
265  
266  
267  
268  
269  
270  
271  
272  
273  
274  
275  
276  
277  
278  
279  
280  
281  
282  
283  
284  
285  
286  
287  
288  
289  
290  
291  
292  
293  
294  
295  
296  
297  
298  
299  
300  
301  
302  
303  
304  
305  
306  
307  
308  
309  
310  
311  
312  
313  
314  
315  
316  
317  
318  
319  
320  
321  
322  
323  
324  
325  
326  
327  
328  
329  
330  
331  
332  
333  
334  
335  
336  
337  
338  
339  
340  
341  
342  
343  
344  
345  
346  
347  
348  
349  
350  
351  
352  
353  
354  
355  
356  
357  
358  
359  
360  
361  
362  
363  
364  
365  
366  
367  
368  
369  
370  
371  
372  
373  
374  
375  
376  
377  
378  
379  
380  
381  
382  
383  
384  
385  
386  
387  
388  
389  
390  
391  
392  
393  
394  
395  
396  
397  
398  
399  
400  
401  
402  
403  
404  
405  
406  
407  
408  
409  
410  
411  
412  
413  
414  
415  
416  
417  
418  
419  
420  
421  
422  
423  
424  
425  
426  
427  
428  
429  
430  
431  
432  
433  
434  
435  
436  
437  
438  
439  
440  
441  
442  
443  
444  
445  
446  
447  
448  
449  
450  
451  
452  
453  
454  
455  
456  
457  
458  
459  
460  
461  
462  
463  
464  
465  
466  
467  
468  
469  
470  
471  
472  
473  
474  
475  
476  
477  
478  
479  
480  
481  
482  
483  
484  
485  
486  
487  
488  
489  
490  
491  
492  
493  
494  
495  
496  
497  
498  
499  
500  
501  
502  
503  
504  
505  
506  
507  
508  
509  
510  
511  
512  
513  
514  
515  
516  
517  
518  
519  
520  
521  
522  
523  
524  
525  
526  
527  
528  
529  
530  
531  
532  
533  
534  
535  
536  
537  
538  
539  
540  
541  
542  
543  
544  
545  
546  
547  
548  
549  
550  
551  
552  
553  
554  
555  
556  
557  
558  
559  
560  
561  
562  
563  
564  
565  
566  
567  
568  
569  
570  
571  
572  
573  
574  
575  
576  
577  
578  
579  
580  
581  
582  
583  
584  
585  
586  
587  
588  
589  
590  
591  
592  
593  
594  
595  
596  
597  
598  
599  
600  
601  
602  
603  
604  
605  
606  
607  
608  
609  
610  
611  
612  
613  
614  
615  
616  
617  
618  
619  
620  
621  
622  
623  
624  
625  
626  
627  
628  
629  
630  
631  
632  
633  
634  
635  
636  
637  
638  
639  
640  
641  
642  
643  
644  
645  
646  
647  
648  
649  
650  
651  
652  
653  
654  
655  
656  
657  
658  
659  
660  
661  
662  
663  
664  
665  
666  
667  
668  
669  
670  
671  
672  
673  
674  
675  
676  
677  
678  
679  
680  
681  
682  
683  
684  
685  
686  
687  
688  
689  
690  
691  
692  
693  
694  
695  
696  
697  
698  
699  
700  
701  
702  
703  
704  
705  
706  
707  
708  
709  
710  
711  
712  
713  
714  
715  
716  
717  
718  
719  
720  
721  
722  
723  
724  
725  
726  
727  
728  
729  
730  
731  
732  
733  
734  
735  
736  
737  
738  
739  
740  
741  
742  
743  
744  
745  
746  
747  
748  
749  
750  
751  
752  
753  
754  
755  
756  
757  
758  
759  
760  
761  
762  
763  
764  
765  
766  
767  
768  
769  
770  
771  
772  
773  
774  
775  
776  
777  
778  
779  
780  
781  
782  
783  
784  
785  
786  
787  
788  
789  
790  
791  
792  
793  
794  
795  
796  
797  
798  
799  
800  
801  
802  
803  
804  
805  
806  
807  
808  
809  
810  
811  
812  
813  
814  
815  
816  
817  
818  
819  
820  
821  
822  
823  
824  
825  
826  
827  
828  
829  
830  
831  
832  
833  
834  
835  
836  
837  
838  
839  
840  
841  
842  
843  
844  
845  
846  
847  
848  
849  
850  
851  
852  
853  
854  
855  
856  
857  
858  
859  
860  
861  
862  
863  
864  
865  
866  
867  
868  
869  
870  
871  
872  
873  
874  
875  
876  
877  
878  
879  
880  
881  
882  
883  
884  
885  
886  
887  
888  
889  
890  
891  
892  
893  
894  
895  
896  
897  
898  
899  
900  
901  
902  
903  
904  
905  
906  
907  
908  
909  
910  
911  
912  
913  
914  
915  
916  
917  
918  
919  
920  
921  
922  
923  
924  
925  
926  
927  
928  
929  
930  
931  
932  
933  
934  
935  
936  
937  
938  
939  
940  
941  
942  
943  
944  
945  
946  
947  
948  
949  
950  
951  
952  
953  
954  
955  
956  
957  
958  
959  
960  
961  
962  
963  
964  
965  
966  
967  
968  
969  
970  
971  
972  
973  
974  
975  
976  
977  
978  
979  
980  
981  
982  
983  
984  
985  
986  
987  
988  
989  
990  
991  
992  
993  
994  
995  
996  
997  
998  
999  
1000

### 44 45 **Explanation and Comparison with Other Studies**

46  
47 Our per instrument labour cost of \$0.13 is comparable to the \$0.10 USD per instrument  
48  
49  
50  
51  
52  
53  
54  
55  
56  
57  
58  
59  
60  
61  
62  
63  
64  
65  
66  
67  
68  
69  
70  
71  
72  
73  
74  
75  
76  
77  
78  
79  
80  
81  
82  
83  
84  
85  
86  
87  
88  
89  
90  
91  
92  
93  
94  
95  
96  
97  
98  
99  
100  
101  
102  
103  
104  
105  
106  
107  
108  
109  
110  
111  
112  
113  
114  
115  
116  
117  
118  
119  
120  
121  
122  
123  
124  
125  
126  
127  
128  
129  
130  
131  
132  
133  
134  
135  
136  
137  
138  
139  
140  
141  
142  
143  
144  
145  
146  
147  
148  
149  
150  
151  
152  
153  
154  
155  
156  
157  
158  
159  
160  
161  
162  
163  
164  
165  
166  
167  
168  
169  
170  
171  
172  
173  
174  
175  
176  
177  
178  
179  
180  
181  
182  
183  
184  
185  
186  
187  
188  
189  
190  
191  
192  
193  
194  
195  
196  
197  
198  
199  
200  
201  
202  
203  
204  
205  
206  
207  
208  
209  
210  
211  
212  
213  
214  
215  
216  
217  
218  
219  
220  
221  
222  
223  
224  
225  
226  
227  
228  
229  
230  
231  
232  
233  
234  
235  
236  
237  
238  
239  
240  
241  
242  
243  
244  
245  
246  
247  
248  
249  
250  
251  
252  
253  
254  
255  
256  
257  
258  
259  
260  
261  
262  
263  
264  
265  
266  
267  
268  
269  
270  
271  
272  
273  
274  
275  
276  
277  
278  
279  
280  
281  
282  
283  
284  
285  
286  
287  
288  
289  
290  
291  
292  
293  
294  
295  
296  
297  
298  
299  
300  
301  
302  
303  
304  
305  
306  
307  
308  
309  
310  
311  
312  
313  
314  
315  
316  
317  
318  
319  
320  
321  
322  
323  
324  
325  
326  
327  
328  
329  
330  
331  
332  
333  
334  
335  
336  
337  
338  
339  
340  
341  
342  
343  
344  
345  
346  
347  
348  
349  
350  
351  
352  
353  
354  
355  
356  
357  
358  
359  
360  
361  
362  
363  
364  
365  
366  
367  
368  
369  
370  
371  
372  
373  
374  
375  
376  
377  
378  
379  
380  
381  
382  
383  
384  
385  
386  
387  
388  
389  
390  
391  
392  
393  
394  
395  
396  
397  
398  
399  
400  
401  
402  
403  
404  
405  
406  
407  
408  
409  
410  
411  
412  
413  
414  
415  
416  
417  
418  
419  
420  
421  
422  
423  
424  
425  
426  
427  
428  
429  
430  
431  
432  
433  
434  
435  
436  
437  
438  
439  
440  
441  
442  
443  
444  
445  
446  
447  
448  
449  
450  
451  
452  
453  
454  
455  
456  
457  
458  
459  
460  
461  
462  
463  
464  
465  
466  
467  
468  
469  
470  
471  
472  
473  
474  
475  
476  
477  
478  
479  
480  
481  
482  
483  
484  
485  
486  
487  
488  
489  
490  
491  
492  
493  
494  
495  
496  
497  
498  
499  
500  
501  
502  
503  
504  
505  
506  
507  
508  
509  
510  
511  
512  
513  
514  
515  
516  
517  
518  
519  
520  
521  
522  
523  
524  
525  
526  
527  
528  
529  
530  
531  
532  
533  
534  
535  
536  
537  
538  
539  
540  
541  
542  
543  
544  
545  
546  
547  
548  
549  
550  
551  
552  
553  
554  
555  
556  
557  
558  
559  
560  
561  
562  
563  
564  
565  
566  
567  
568  
569  
570  
571  
572  
573  
574  
575  
576  
577  
578  
579  
580  
581  
582  
583  
584  
585  
586  
587  
588  
589  
590  
591  
592  
593  
594  
595  
596  
597  
598  
599  
600  
601  
602  
603  
604  
605  
606  
607  
608  
609  
610  
611  
612  
613  
614  
615  
616  
617  
618  
619  
620  
621  
622  
623  
624  
625  
626  
627  
628  
629  
630  
631  
632  
633  
634  
635  
636  
637  
638  
639  
640  
641  
642  
643  
644  
645  
646  
647  
648  
649  
650  
651  
652  
653  
654  
655  
656  
657  
658  
659  
660  
661  
662  
663  
664  
665  
666  
667  
668  
669  
670  
671  
672  
673  
674  
675  
676  
677  
678  
679  
680  
681  
682  
683  
684  
685  
686  
687  
688  
689  
690  
691  
692  
693  
694  
695  
696  
697  
698  
699  
700  
701  
702  
703  
704  
705  
706  
707  
708  
709  
710  
711  
712  
713  
714  
715  
716  
717  
718  
719  
720  
721  
722  
723  
724  
725  
726  
727  
728  
729  
730  
731  
732  
733  
734  
735  
736  
737  
738  
739  
740  
741  
742  
743  
744  
745  
746  
747  
748  
749  
750  
751  
752  
753  
754  
755  
756  
757  
758  
759  
760  
761  
762  
763  
764  
765  
766  
767  
768  
769  
770  
771  
772  
773  
774  
775  
776  
777  
778  
779  
780  
781  
782  
783  
784  
785  
786  
787  
788  
789  
790  
791  
792  
793  
794  
795  
796  
797  
798  
799  
800  
801  
802  
803  
804  
805  
806  
807  
808  
809  
810  
811  
812  
813  
814  
815  
816  
817  
818  
819  
820  
821  
822  
823  
824  
825  
826  
827  
828  
829  
830  
831  
832  
833  
834  
835  
836  
837  
838  
839  
840  
841  
842  
843  
844  
845  
846  
847  
848  
849  
850  
851  
852  
853  
854  
855  
856  
857  
858  
859  
860  
861  
862  
863  
864  
865  
866  
867  
868  
869  
870  
871  
872  
873  
874  
875  
876  
877  
878  
879  
880  
881  
882  
883  
884  
885  
886  
887  
888  
889  
890  
891  
892  
893  
894  
895  
896  
897  
898  
899  
900  
901  
902  
903  
904  
905  
906  
907  
908  
909  
910  
911  
912  
913  
914  
915  
916  
917  
918  
919  
920  
921  
922  
923  
924  
925  
926  
927  
928  
929  
930  
931  
932  
933  
934  
935  
936  
937  
938  
939  
940  
941  
942  
943  
944  
945  
946  
947  
948  
949  
950  
951  
952  
953  
954  
955  
956  
957  
958  
959  
960  
961  
962  
963  
964  
965  
966  
967  
968  
969  
970  
971  
972  
973  
974  
975  
976  
977  
978  
979  
980  
981  
982  
983  
984  
985  
986  
987  
988  
989  
990  
991  
992  
993  
994  
995  
996  
997  
998  
999  
1000

1  
2  
3 instrument.[5,11] The input data for these cost estimates are not provided and thus the  
4  
5 reasons for the higher costs when compared to our study are unclear. Our per instrument  
6  
7 processing cost was also lower than that of Farrouki et al with a per instrument processing  
8  
9 cost of \$0.77USD.[12] This estimate incorporated indirect costs and this accounts for some  
10  
11 of the discrepancy when compared to our per instrument cost.  
12  
13  
14  
15  
16  
17

18 Several studies reported overall cost-saving estimates. In the Netherlands, cost savings  
19  
20 were estimated to range between €55,000 and €81,360 each year.[5] Farrokhi et al  
21  
22 estimated potential savings of up to \$2.8 million a year with a 70% reduction in instrument  
23  
24 processing for all surgical procedures at Virginia Mason Medical Center, a 300-bed hospital  
25  
26 with 24 operating rooms.[12] The higher cost saving estimates when compared to our base  
27  
28 case estimate are due in large part to the inclusion of a broader range of surgical  
29  
30 procedures, [5,12] and inclusion of overhead costs.[12] Wannemuehler et al estimated  
31  
32 annual savings of \$850 in sterile processing costs and a further \$1,468.99 savings in  
33  
34 instrument purchasing costs associated with reducing an adenotonsillectomy tray set. [8]  
35  
36  
37  
38  
39  
40  
41

42 Indirect cost savings have been incorporated into other surgical instrument cost  
43  
44 analyses.[7,12,13] Our base case estimate of cost savings conservatively excluded overhead  
45  
46 costs. Our cost estimate would be an underestimate of the overall savings, if the reduction  
47  
48 in five otolaryngology trays were applied within a strategy spanning multiple procedures  
49  
50 and surgical services. Scenario analysis, incorporating the indirect costs of reagents,  
51  
52 utilities, quality checks and equipment maintenance, suggested higher potential cost  
53  
54 savings of \$29,088 (2013 CAD).  
55  
56  
57  
58  
59  
60

## Limitations

Our study has a few limitations that deserve discussion. First, our study is model-based and therefore we incorporated data from a study conducted in the United States. Uncertainty about variables can affect the results and lead to over- or under-estimation of the savings. We mitigated this by incorporating local data when possible, converting from US dollars to Canadian dollars using purchasing power parities and performing extensive sensitivity analysis.

Our study did not account for impacts on operating room processes. Tray reduction may result in faster operating room set-up, easier retrieval of instruments during operations and faster operating room clean-up. The evidence suggests that tray reduction speeds up operating room setup. This has recently been shown in the Otolaryngology literature, with a significant one-minute reduction in operating room turnover before and after reducing the number of instruments on the adenotonsillectomy tray. Farrokhi et al compared processes before and after tray optimization and found that a 70% reduction in the number of instruments for minimally invasive spine surgery (197 to 58), decreased setup time by 37% (13.1–8.2 min,  $p = .0015$ ).<sup>[12]</sup> Faster setup could increase throughput. We chose to exclude cost impacts from increased throughput because this approach would have required a different framework to account for the benefits. Faster throughput may result in more surgical procedures, and this would increase hospital efficiency, but also increase overall costs. Tray reduction may also result in adverse consequences such as the need,



1  
2  
3 albeit infrequently, to retrieve instruments that are not on the surgical trays during  
4  
5 procedures. Making a tray readily accessible in the operating room to be opened when  
6  
7 extra instruments are required is a precautionary measure that can ensure clinical  
8  
9 outcomes are not adversely affected. After implementing reduction in the  
10  
11 adenotonsillectomy tray, Wannemuehler et al found that the extras tray was accessed 3.6%  
12  
13 of the time and 93.75% of surgeons and other personnel were satisfied with the  
14  
15 reductions.[8] An extras tray would attenuate tray reduction cost savings slightly, due to  
16  
17 the need for sterile processing of the extras tray.  
18  
19  
20  
21  
22  
23  
24

25 The cost savings we estimated may not represent real savings to the hospital, particularly if  
26  
27 there are no adjustments to the number of hours worked by CP personnel. However, we are  
28  
29 confident in our assumption of a linear relationship between time savings and cost savings.  
30  
31 At our institutions, central processing personnel are paid by the hour and managers have  
32  
33 recently reduced hours to address budgetary challenges. In 2015, the reduction in  
34  
35 employee hours at LHSC was equivalent to 97 full-time positions and at SJHC equivalent to  
36  
37 24 full-time positions.[14] This suggests that time savings from reduced trays has the  
38  
39 potential to translate into cost savings.  
40  
41  
42  
43  
44  
45  
46

47 The cost-savings are based on a sampling of retrospective data, and ideally would be  
48  
49 validated through prospective implementation of tray optimization. We have not yet  
50  
51 implemented tray reduction at our institutions, but surgeons are supportive of the  
52  
53 initiative.  
54  
55  
56  
57  
58  
59  
60

## Conclusions and Implications for Practice and Future Research

Eliminating tray redundancy for five otolaryngology procedures is associated with a potential cost saving of \$13,003 (2013 CAD). Due to the promise for cost-savings, the extent and generalizability of the savings, along with the impact on operating room processes, should be explored further in prospective studies. We are in the process of implementing reduced trays and addressing safety concerns. We have proposed to remove instruments used less than 80% of the time and make all other instruments available on an extras tray. We will also ask attending surgeons to review the instruments to be removed and identify those considered “essential” in a life-threatening situation (for example, the cricoid hook in the tracheotomy tray), which will remain on the tray, regardless of the utilization rate. We feel that a minority of instruments would fall into this category and would have minimal impact on our results. We intend to monitor setup time and study nurse and physician satisfaction. If tray redundancy is as common as literature-based estimates suggest, the broader implications for health care systems in Canada would be significant when projected over a number of surgical procedures. For hospitals and departments interested in tray reduction, our suggestion would be to engage all invested parties including nurses, physicians and operating room personnel, identify frequently opened trays and measure instrument utilization rates. Commercial products exist that can help facilitate instrument reduction and supply chain optimization. Our findings indicate that eliminating tray redundancy may be a simple and feasible opportunity for hospitals seeking to reduce costs.

## Acknowledgements

The authors would like to thank Drs. Jenna Theriault, David H Yeh, Winsion Chow, Jordan Glicksman as well as OR Nurses Deborah Drake, Holly MacDonald, Sharon Zegers, Tracy Dawiczewski, Maria Marques, Miriam Zucker and Kathi Christiansen for their assistance with data collection.

## Sources of Funding

Ava John-Baptiste was funded by a start-up grant from the Department of Anesthesia & Perioperative Medicine.

## Conflicts of Interest

The authors have no conflicts of interest to declare.

## References

1. Canadian Institute for Health Information. National Health Expenditure Trends, 1975 to 2015. Ottawa, ON: CIHI; 2015. Available from: <http://www.cihi.ca>. Accessed March 5, 2016.
2. Health System Funding Reform (HSFR). Ontario Ministry of Health and Long-Term Care. Available from: [http://www.health.gov.on.ca/en/pro/programs/ecfa/funding/hs\\_funding.aspx](http://www.health.gov.on.ca/en/pro/programs/ecfa/funding/hs_funding.aspx) Accessed July 20, 2015.
3. Sutherland JM. Hospital Payment Mechanisms: An Overview and Options for Canada (2011) Canadian Health Services Research Foundation. Available from: <http://www.chsrf.ca>. Accessed. July 4, 2015.
4. Canadian Institute for Health Information. Surgical volume trends, 2008 – Within and beyond wait time priority areas. Ottawa, Ontario: CIHI, 2008.
5. Kroes L. (2009). Creating more efficiency and patient safety by changing processes and contents of instrument trays. Master thesis Health Science School of Management and Governance. Department of Science, Technology, Health and Policy studies (STeHPS) University of Twente, Enschede, The Netherlands.
6. Morris LF, Romero Arenas MA, Cerny J, et al. Streamlining variability in hospital charges for standard thyroidectomy: Developing a strategy to decrease waste. *Surgery*. 2014;156:1441-9; discussion 9.
7. Stockert EW, Langerman A. Assessing the magnitude and costs of intraoperative inefficiencies attributable to surgical instrument trays. *JAm Coll Surg*. 2014;219:646-55.
8. Wannemuehler TJ, Elghouche AN, Kokoska MS, Deig CR, Matt BH. Impact of Lean on surgical instrument reduction: Less is more. *Laryngoscope*. 2015;125:2810-5.
9. Chin CJ, Sowerby LJ, John-Baptiste A, Rotenberg BW. Reducing otolaryngology surgical inefficiency via assessment of tray redundancy. *JOtolaryngol Head Neck Surg*. 2014;43:46.
10. Purchasing Power Parity 2005. Choosing interventions that are Cost Effective (WHO-CHOICE). World Health Organization. Available from: <http://www.who.int/choice/costs/ppp/en/>. Accessed July 20, 2015.
11. Florijn EP. (2008). Optimisation of the distribution of surgical instruments over trays. Cost effectiveness and quality improvement of an operating theatre. Master thesis Industrial engineering and management. Logistical processes in healthcare. University of Twente, Enschede, The Netherlands.
12. Farrokhi FR, Gunther M, Williams B, Blackmore CC. Application of Lean Methodology for Improved Quality and Efficiency in Operating Room Instrument Availability. *JHealthc Qual*. 2015.
13. Prat F, Spieler JF, Paci S, et al. Reliability, cost-effectiveness, and safety of reuse of ancillary devices for ERCP. *Gastrointest Endosc*. 2004;60:246-52.
14. London Hospitals Forced To Cut Millions From Budgets, St. Joseph's Dips Into Reserves. AM980. Available from: <http://www.am980.ca/2015/03/31/42341/> Accessed July 20, 2015.

1  
2  
3 Since routinely collected data on decontamination times and per instrument depreciation  
4 costs were not available from the local hospitals, we conducted a review of the literature to  
5 identify studies with relevant information. We incorporated a decontamination time of  
6 4.02s per instrument estimated at the University of Chicago Medicine Hospitals using data  
7 from 61 trays.[7] We incorporated a minimum and maximum decontamination time for  
8 trays with more than 10 instruments from this study. [7] Minimum and maximum  
9 decontamination times were 1.07s (15s, 14 instruments) and 13.64s (22s, 300  
10 instruments) per instrument, respectively. From the literature, we incorporated a mean  
11 per instrument depreciation cost of 0.06 USD (minimum \$0.02 USD, maximum \$0.18 USD)  
12 that had been calculated by dividing instrument purchase prices by their estimated  
13 lifespans.[7] We used the purchasing power parity for health of 1.0206 to convert US  
14 Dollars to Canadian dollars.[10] The Purchasing Power Parity for health is an exchange rate  
15 estimated by comparing the price of a standard package of health-related goods and  
16 services, including hospital services, between two countries.  
17  
18  
19  
20  
21  
22  
23  
24  
25  
26  
27  
28  
29  
30  
31  
32  
33  
34  
35  
36  
37  
38  
39  
40  
41  
42  
43  
44  
45  
46  
47  
48

49 Sensitivity Analysis  
50  
51  
52  
53 We performed a series of one-way sensitivity analyses. We varied each parameter across  
54 its plausible range, with the other parameters set to their base case values. In this way, we  
55  
56  
57  
58  
59  
60

1  
2  
3 characterized minimum and maximum cost savings for the range of each input parameter.  
4  
5 We varied the reduction in tray size from 25% to 110%, corresponding to less reduction in  
6  
7 tray size and greater reduction, respectively. We also, varied the surgical volume between  
8  
9 25% and 400%, corresponding to a low and high surgical volume, respectively. The  
10  
11 surgical volume at our institution does not vary to a great extent. Sensitivity analysis on  
12  
13 surgical volume is however pertinent to the external generalizability of our estimates to  
14  
15 other institutions.  
16  
17  
18  
19  
20

21  
22 A complete list of input parameters, ranges and sources is provided in Table 2.  
23  
24  
25  
26

### 27 Scenario Analysis

28  
29  
30  
31

32 In the study conducted at the University of Chicago Medicine Hospitals, investigators  
33  
34 estimated indirect cost savings from reduced trays for 49 procedures, spanning four  
35  
36 surgical services (otolaryngology, plastic surgery, bariatric surgery and neurology).  
37  
38 Indirect cost savings were estimated by allocating the operating costs of the sterile  
39  
40 processing unit to each instrument to account for decreases in utilities, reagents, quality  
41  
42 checks and equipment maintenance.[7] We incorporated these additional cost savings into  
43  
44 a scenario analysis, rather than the base case analysis, due to concerns that reductions in  
45  
46 indirect cost are sensitive to scale. In our hospital, reagents for the washer-disinfector are  
47  
48 used in standard aliquots irrespective of the number of surgical trays or the number of  
49  
50 instruments in the machine. Reducing trays for five surgical procedures would not likely  
51  
52 result in fewer cycles of operation for the washer-disinfector and thus significant savings  
53  
54  
55  
56  
57  
58  
59  
60

1  
2  
3 from utilities, reagents and equipment repair and maintenance would not likely be realized.

4  
5 In the scenario analysis we incorporated a per instrument indirect cost of \$0.23 USD by  
6  
7  
8 converting to Canadian dollars using the purchasing power parity.[7,10] (Table 2)  
9  
10

11  
12  
13 Costs were estimated in 2013 Canadian dollars, from the hospital perspective, over a one-  
14  
15 year time horizon. A one-year time horizon is sufficient to demonstrate potential cost  
16  
17 savings. As a result, no discount rate was applied.  
18  
19  
20  
21  
22  
23  
24  
25  
26  
27  
28  
29  
30  
31  
32  
33  
34  
35  
36  
37  
38  
39  
40  
41  
42  
43  
44  
45  
46  
47  
48  
49  
50  
51  
52  
53  
54  
55  
56  
57  
58  
59  
60

Confidential

## Results

In the base case analysis, the estimated annual cost of redundant trays at LHSC and SJHC for the five procedures was \$21,806 (2013 CAD) and the annual cost of reduced trays is expected to be \$8,803 (2013 CAD). Our analysis suggests that if we implemented the proposed tray reduction at our institution, based on the number of procedures performed in 2013, we may have saved \$13,003 (2013 CAD) in that year. Our base case per instrument labour cost was \$0.13 (2013 CAD).

Based on the surgical volume at our own institution, the extent of tray reduction was an important factor in the cost-saving estimates. One-way sensitivity analysis suggested that removing fewer instruments from the tray at 25% of the base case reduction would result in a cost saving of \$3,262 (2013 CAD), whereas removing 10% more than the base case would result in a cost saving of \$14,300. The per instrument packing time was also an important factor. In one-way sensitivity analysis, the estimated cost savings ranged from \$8,951 to \$18,773 (2013 CAD), over the plausible range of per instrument packing time.

Variation in surgical volume was associated with the largest variation in cost savings estimates. With all other parameters remaining the same, an institution performing  $\frac{1}{4}$  of the volume would save \$3,253 (2013 CAD). An institution performing four times the surgical volume would save \$52,012 per year (2013 CAD).



1  
2  
3 In a scenario analysis that incorporated indirect cost savings, the cost of redundant trays  
4  
5 was \$48,781, (2013 CAD), the cost of reduced trays \$19,692, (2013 CAD), and the  
6  
7  
8 estimated cost savings, \$29,088 (2013 CAD) per year.  
9  
10

## 11 12 13 **Interpretation**

### 14 15 16 17 18 **Main Findings**

19  
20 Our analysis suggests cost savings of \$13,003 (2013 CAD) per year can be achieved by  
21  
22 reducing surgical trays for five otolaryngology procedures. In sensitivity analysis, the  
23  
24 estimated cost savings range from \$8,951 to \$21,395 (2013 CAD) based on the upper and  
25  
26 lower limits of input parameters at our institution. Sensitivity analysis on surgical volumes  
27  
28 suggests a range of cost savings from \$3,253 to \$52,012 (2013 CAD) per year, for an  
29  
30 institution performing  $\frac{1}{4}$  and four times the number of procedures, respectively. While  
31  
32 these savings are modest when considered in the context of the entire hospital budget, the  
33  
34 cost impact could be greater if redundancy was addressed for a broader range of surgical  
35  
36 procedures across surgical specialties.  
37  
38  
39  
40  
41  
42  
43

### 44 45 **Explanation and Comparison with Other Studies**

46  
47 Our per instrument labour cost of \$0.13 is comparable to the \$0.10 USD per instrument  
48  
49 estimated by Stockert et al.[7] Our institution did have a higher per instrument packing  
50  
51 time of 17.6s indicated by our local hospital data, compared to 12.51s in this study.[7] Our  
52  
53 per instrument cost is lower than that obtained by Morris et al with a per instrument  
54  
55 processing cost of \$0.70 USD, and lower than Florijn with an estimate of €1 per  
56  
57  
58  
59  
60

1  
2  
3 instrument.[5,11] The input data for these cost estimates are not provided and thus the  
4  
5 reasons for the higher costs when compared to our study are unclear. Our per instrument  
6  
7 processing cost was also lower than that of Farrouki et al with a per instrument processing  
8  
9 cost of \$0.77USD.[12] This estimate incorporated indirect costs and this accounts for some  
10  
11 of the discrepancy when compared to our per instrument cost.  
12  
13  
14  
15  
16  
17

18 Several studies reported overall cost-saving estimates. In the Netherlands, cost savings  
19  
20 were estimated to range between €55,000 and €81,360 each year.[5] Farrokhi et al  
21  
22 estimated potential savings of up to \$2.8 million a year with a 70% reduction in instrument  
23  
24 processing for all surgical procedures at Virginia Mason Medical Center, a 300-bed hospital  
25  
26 with 24 operating rooms.[12] The higher cost saving estimates when compared to our base  
27  
28 case estimate are due in large part to the inclusion of a broader range of surgical  
29  
30 procedures, [5,12] and inclusion of overhead costs.[12] Wannemuehler et al estimated  
31  
32 annual savings of \$850 in sterile processing costs and a further \$1,468.99 savings in  
33  
34 instrument purchasing costs associated with reducing an adenotonsillectomy tray set. [8]  
35  
36  
37  
38  
39  
40  
41

42 Indirect cost savings have been incorporated into other surgical instrument cost  
43  
44 analyses.[7,12,13] Our base case estimate of cost savings conservatively excluded overhead  
45  
46 costs. Our cost estimate would be an underestimate of the overall savings, if the reduction  
47  
48 in five otolaryngology trays were applied within a strategy spanning multiple procedures  
49  
50 and surgical services. Scenario analysis, incorporating the indirect costs of reagents,  
51  
52 utilities, quality checks and equipment maintenance, suggested higher potential cost  
53  
54 savings of \$29,088. (2013 CAD).  
55  
56  
57  
58  
59  
60

## Limitations

Our study has a few limitations that deserve discussion. First, our study is model-based and therefore we incorporated data from a study conducted in the United States. Uncertainty about variables can affect the results and lead to over- or under-estimation of the savings. We mitigated this by incorporating local data when possible, converting from US dollars to Canadian dollars using purchasing power parities and performing extensive sensitivity analysis.

Our study did not account for impacts on operating room processes. Tray reduction may result in faster operating room set-up, easier retrieval of instruments during operations and faster operating room clean-up. The evidence suggests that tray reduction speeds up operating room setup. This has recently been shown in the Otolaryngology literature, with a significant one-minute reduction in operating room turnover before and after reducing the number of instruments on the adenotonsillectomy tray. Farrokhi et al compared processes before and after tray optimization and found that a 70% reduction in the number of instruments for minimally invasive spine surgery (197 to 58), decreased setup time by 37% (13.1–8.2 min,  $p = .0015$ ).[12] Faster setup could increase throughput. We chose to exclude cost impacts from increased throughput because this approach would have required a different framework to account for the benefits. Faster throughput may result in more surgical procedures, and this would increase hospital efficiency, but also increase overall costs. Tray reduction may also result in adverse consequences such as the need,

1  
2  
3  
4  
5  
6  
7  
8  
9  
10  
11  
12  
13  
14  
15  
16  
17  
18  
19  
20  
21  
22  
23  
24  
25  
26  
27  
28  
29  
30  
31  
32  
33  
34  
35  
36  
37  
38  
39  
40  
41  
42  
43  
44  
45  
46  
47  
48  
49  
50  
51  
52  
53  
54  
55  
56  
57  
58  
59  
60

albeit infrequently, to retrieve instruments that are not on the surgical trays during procedures. Making a tray readily accessible in the operating room to be opened when extra instruments are required is a precautionary measure that can ensure clinical outcomes are not adversely affected. After implementing reduction in the adenotonsillectomy tray, Wannemuehler et al found that the extras tray was accessed 3.6% of the time and 93.75% of surgeons and other personnel were satisfied with the reductions.[8] An extras tray would attenuate tray reduction cost savings slightly, due to the need for sterile processing of the extras tray.

The cost savings we estimated may not represent real savings to the hospital, particularly if there are no adjustments to the number of hours worked by CP personnel. However, we are confident in our assumption of a linear relationship between time savings and cost savings. At our institutions, central processing personnel are paid by the hour and managers have recently reduced hours to address budgetary challenges. In 2015~~-year~~, the reduction in employee hours at LHSC was equivalent to 97 full-time positions and at SJHC equivalent to 24 full-time positions.[14] This suggests that time savings from reduced trays has the potential to translate into cost savings.

The cost-savings are based on a sampling of retrospective data, and ideally would be validated through prospective implementation of tray optimization. We have not yet implemented tray reduction at our institutions, but surgeons are supportive of the initiative.

## Conclusions and Implications for Practice and Future Research

~~We are in the process of implementing reduced trays, and are addressing safety concerns. We have proposed to remove instruments if they were used less than 80% of the time, as mentioned previously. [8] We plan to have all other instruments available (for instance on a “sinus extras” tray) in an attempt to reduce the time needed to acquire the extra instruments if needed. We will also ask attending surgeons to review the instruments to be removed. If any surgeon feels that an instrument could be considered “essential” in a life-threatening situation (for example, the cricoid hook in the tracheotomy tray) then it will be left on the tray, regardless of its’ utilization rate. We feel that a minority of instruments would fall into this category and would have minimal impact on our results. We intend to study both nurse and physician satisfaction and to evaluate whether or not we achieve reductions in setup time, which we would expect based on the current literature. [11]~~

~~For hospitals and departments looking to study this in the future, our suggestion would be to first have an open discussion with all invested parties, and to make sure nursing, physicians and operating room personnel are in agreement. The next step would be to evaluate which instruments are infrequently used, and start with trays that are frequently opened (for example, in our study the septoplasty tray). [8] Commercial products also exist that can help facilitate instrument reduction and supply chain optimization.~~

1  
2  
3 Eliminating tray redundancy for five otolaryngology procedures is associated with a  
4  
5 potential cost saving of \$13,003- (2013 CAD). Due to the promise for cost-savings, the  
6  
7 extent and generalizability of the savings, along with the impact on operating room  
8  
9 processes, should be explored further in prospective studies. We are in the process of  
10  
11 implementing reduced trays and addressing safety concerns. We have proposed to remove  
12  
13 instruments used less than 80% of the time and make all other instruments available on an  
14  
15 extras tray. We will also ask attending surgeons to review the instruments to be removed  
16  
17 and identify those considered “essential” in a life-threatening situation (for example, the  
18  
19 cricoid hook in the tracheotomy tray), which will remain on the tray, regardless of the  
20  
21 utilization rate. We feel that a minority of instruments would fall into this category and  
22  
23 would have minimal impact on our results. If tray redundancy is as common as literature-  
24  
25 based estimates suggest, We intend to monitor setup time and study nurse and physician  
26  
27 satisfaction. If tray redundancy is as common as literature-based estimates suggest, the  
28  
29 broader implications for health care systems in Canada would be significant when  
30  
31 projected over a number of surgical procedures. For hospitals and departments interested  
32  
33 in tray reduction, our suggestion would be to engage all invested parties including nurses,  
34  
35 physicians and operating room personnel, identify frequently opened trays and measure  
36  
37 instrument utilization rates. Commercial products exist that can help facilitate instrument  
38  
39 reduction and supply chain optimization. Our findings indicate that eliminating tray  
40  
41  
42  
43  
44  
45  
46  
47  
48  
49 redundancy may be a simple and feasible opportunity for hospitals seeking to reduce costs.  
50  
51  
52  
53  
54  
55  
56  
57  
58  
59  
60

1  
2  
3 **Acknowledgements**  
4  
5  
6  
7

8 The authors would like to thank Drs. Jenna Theriault, David H Yeh, Winsion Chow, Jordan  
9 Glicksman as well as OR Nurses Deborah Drake, Holly MacDonald, Sharon Zegers, Tracy  
10 Dawiczewski, Maria Marques, Miriam Zucker and Kathi Christiansen for their assistance  
11 with data collection.  
12  
13  
14  
15  
16

17  
18  
19  
20 **Sources of Funding**  
21

22 Ava John-Baptiste was funded by a start-up grant from the Department of Anesthesia &  
23 Perioperative Medicine.  
24  
25  
26  
27  
28  
29

30 **Conflicts of Interest**  
31

32 The authors have no conflicts of interest to declare.  
33  
34  
35  
36  
37  
38  
39  
40  
41  
42  
43  
44  
45  
46  
47  
48  
49  
50  
51  
52  
53  
54  
55  
56  
57  
58  
59  
60

## References

1. Canadian Institute for Health Information. National Health Expenditure Trends, 1975 to 2015. Ottawa, ON: CIHI; 2015. Available from: <http://www.cihi.ca>. Accessed March 5, 2016.
2. Health System Funding Reform (HSFR). Ontario Ministry of Health and Long-Term Care. Available from: [http://www.health.gov.on.ca/en/pro/programs/ecfa/funding/hs\\_funding.aspx](http://www.health.gov.on.ca/en/pro/programs/ecfa/funding/hs_funding.aspx) Accessed July 20, 2015.
3. Sutherland JM. Hospital Payment Mechanisms: An Overview and Options for Canada (2011) Canadian Health Services Research Foundation. Available from: <http://www.chsrf.ca>. Accessed. July 4, 2015.
4. Canadian Institute for Health Information. Surgical volume trends, 2008 – Within and beyond wait time priority areas. Ottawa, Ontario: CIHI, 2008.
5. Kroes L. (2009). Creating more efficiency and patient safety by changing processes and contents of instrument trays. Master thesis Health Science School of Management and Governance. Department of Science, Technology, Health and Policy studies (STeHPS) University of Twente, Enschede, The Netherlands.
6. Morris LF, Romero Arenas MA, Cerny J, et al. Streamlining variability in hospital charges for standard thyroidectomy: Developing a strategy to decrease waste. *Surgery*. 2014;156:1441-9; discussion 9.
7. Stockert EW, Langerman A. Assessing the magnitude and costs of intraoperative inefficiencies attributable to surgical instrument trays. *JAm Coll Surg*. 2014;219:646-55.
8. Wannemuehler TJ, Elghouche AN, Kokoska MS, Deig CR, Matt BH. Impact of Lean on surgical instrument reduction: Less is more. *Laryngoscope*. 2015;125:2810-5.
9. Chin CJ, Sowerby LJ, John-Baptiste A, Rotenberg BW. Reducing otolaryngology surgical inefficiency via assessment of tray redundancy. *JOtolaryngol Head Neck Surg*. 2014;43:46.
10. Purchasing Power Parity 2005. Choosing interventions that are Cost Effective (WHO-CHOICE). World Health Organization. Available from: <http://www.who.int/choice/costs/ppp/en/>. Accessed July 20, 2015.
11. Florijn EP. (2008). Optimisation of the distribution of surgical instruments over trays. Cost effectiveness and quality improvement of an operating theatre. Master thesis Industrial engineering and management. Logistical processes in healthcare. University of Twente, Enschede, The Netherlands.
12. Farrokhi FR, Gunther M, Williams B, Blackmore CC. Application of Lean Methodology for Improved Quality and Efficiency in Operating Room Instrument Availability. *JHealthc Qual*. 2015.
13. Prat F, Spieler JF, Paci S, et al. Reliability, cost-effectiveness, and safety of reuse of ancillary devices for ERCP. *Gastrointest Endosc*. 2004;60:246-52.
14. London Hospitals Forced To Cut Millions From Budgets, St. Joseph's Dips Into Reserves. AM980. Available from: <http://www.am980.ca/2015/03/31/42341/> Accessed July 20, 2015.



1  
2  
3  
4  
5  
6  
7  
8  
9  
10  
11  
12  
13  
14  
15  
16  
17  
18  
19  
20  
21  
22  
23  
24  
25  
26  
27  
28  
29  
30  
31  
32  
33  
34  
35  
36  
37  
38  
39  
40  
41  
42  
43  
44  
45  
46  
47  
48  
49  
50  
51  
52  
53  
54  
55  
56  
57  
58  
59  
60

Table 1: Otolaryngology surgical trays

|                  | Number of procedures each year | Number of instruments on extant trays | Number of instruments on proposed trays | Difference | Percent Reduction |
|------------------|--------------------------------|---------------------------------------|-----------------------------------------|------------|-------------------|
| Septoplasty      | 197                            | 84                                    | 33                                      | 51         | 61%               |
| Tonsillectomy    | 336                            | 34                                    | 13                                      | 21         | 62%               |
| Skin             | 220                            | 43                                    | 27                                      | 16         | 37%               |
| Sinus            | 505                            | 100                                   | 36                                      | 64         | 64%               |
| Septorhinoplasty | 190                            | 142                                   | 60                                      | 82         | 58%               |

Table 2: Model input parameters

| Variables                               | Base Case Value | Range            | Source                                                                          |
|-----------------------------------------|-----------------|------------------|---------------------------------------------------------------------------------|
| Per instrument decontamination time (s) | 4.02            | (1.07, 13.64)    | Stockert et al [7]                                                              |
| Per instrument packing time (s)         | 17.5            | (7.6, 31.6)      | Analysis of Local Hospital Data on Tray Packing Times                           |
| Per second cost of personnel time       | 0.006           | (0.0058, 0.0061) | Derived from Hospital Human Resources Data by Dividing Hourly Wages by 3600     |
| Per instrument cost of depreciation     | 0.06            | (0.02, 0.18)     | Derived from Stockert et al. [7] Using Purchasing Power Parities for Health [9] |
| Per instrument indirect cost            | 0.23            | NA               | Derived from Stockert et al. [7] Using Purchasing Power Parities for Health [9] |

Table 3: Results of one-way sensitivity analysis

|                                         | Minimum Value                             | Maximum Value                              | Minimum Cost Saving | Maximum Cost Saving |
|-----------------------------------------|-------------------------------------------|--------------------------------------------|---------------------|---------------------|
| Per instrument decontamination time (s) | 1.07                                      | 13.64                                      | \$11,796            | \$16,940            |
| Per instrument packing time (s)         | 7.6                                       | 31.6                                       | \$8,951             | \$18,773            |
| Per second cost of personnel time       | 0.0058                                    | 0.0061                                     | \$12,798            | \$13,208            |
| Per instrument cost of depreciation     | 0.02                                      | 0.18                                       | \$10,205            | \$21,395            |
| Tray Reduction                          | Smaller Tray Reduction (25% of Base Case) | Larger Tray Reduction (110% of Base Case)  | \$3,262             | \$14,300            |
| Surgical Volume                         | Lower Surgical Volume (25% of Base Case)  | Higher Surgical Volume (400% of Base Case) | \$3,253             | \$52,012            |

\*The base case cost saving estimate is \$13,003.

## Appendix 1a – Extant Tray Composition Tonsillectomy

| DESCRIPTION                                        | CATALOG          | QTY |
|----------------------------------------------------|------------------|-----|
| DAVIS MOUTH GAG RIGHT DBL (Boyle Davis)            | Storz N7450      | 1   |
| BLADE TONGUE LARGE 4                               |                  | 1   |
| BLADE TONGUE MED 3 1/2                             |                  | 1   |
| BLADE TONGUE SMALL 3                               |                  | 1   |
| FCP ROCH-PEAN HEMOSTAT CVD 6 1/4 (Curved Kelly)    | Pilling 182445   | 3   |
| WHITE TONSIL FCP.MED.CVD. (Tenaculum)              | Storz N7032      | 1   |
| DISSECTOR HURD/RETR PILLAR D/E (Pillar Retractor)  | Storz N6750      | 1   |
| BASIN EMESIS EX SMALL (Kidney)                     |                  | 1   |
| CUP IODINE 6 OZ (Large, circular)                  | Pilling 471120   | 1   |
| PEERS NON-PEF TOWEL CLAMP                          | Pilling 12-1650  | 1   |
| CUP MEDICINE 2 OZ                                  | Pilling 471115   | 3   |
| SCALPEL HANDLE 7                                   | K-Medic KM29-062 | 1   |
| MIRROR DENTAL                                      |                  | 1   |
| CURETTE SMALL (Adenoid Curette)                    |                  | 1   |
| CURETTE LARGE (Adenoid Curette)                    |                  | 1   |
| KNIFE FISHER (Fisher Blade)                        |                  | 1   |
| TISSUE TONSIL (Pickups)                            |                  | 1   |
| WIEDER TONGUE DEPRESSOR L (Sweetheart)             | Storz N7332      | 1   |
| WIRE SNARE # 8 (Snare)                             | Pilling 461264   | 2   |
| RETR LOVE UVULA 18MM                               | Storz N6200      | 1   |
| TENACULA SHORT (Smaller Tenaculum)                 |                  | 1   |
| SCHNIDT FCP 7 1/4 OPEN (Snaps)                     | Storz N7122      | 2   |
| HOOK NEGRAS                                        |                  | 1   |
| FCP ALLIS TISSUE 5 X 6 TEETH 6" REG WEIGHT (Allis) | Pilling 182860   | 3   |
| SCISS METZ CVD 7 (Metz)                            | Pilling 141462   | 1   |
| RONIS ADENOID PUNCH                                | Storz N6178      | 1   |

Total

34

1  
2  
3  
4  
5  
6  
7  
8  
9  
10  
11  
12  
13  
14  
15  
16  
17  
18  
19  
20  
21  
22  
23  
24  
25  
26  
27  
28  
29  
30  
31  
32  
33  
34  
35  
36  
37  
38  
39  
40  
41  
42  
43  
44  
45  
46  
47  
48  
49  
50  
51  
52  
53  
54  
55  
56  
57  
58  
59  
60

Appendix 1b – Reduced Tray Composition Tonsillectomy

| DESCRIPTION                                       | CATALOG             | QTY |
|---------------------------------------------------|---------------------|-----|
| DAVIS MOUTH GAG RIGHT DBL (Boyle Davis)           | Storz N7450         | 1   |
| BLADE TONGUE LARGE 4                              |                     | 1   |
| BLADE TONGUE MED 3 1/2                            |                     | 1   |
| BLADE TONGUE SMALL 3                              |                     | 1   |
| FCP ROCH-PEAN HEMOSTAT CVD 6 1/4 (Curved Kelly)   | Pilling<br>182445   | 3   |
| WHITE TONSIL FCP.MED.CVD. (Tenaculum)             | Storz N7032         | 1   |
| DISSECTOR HURD/RETR PILLAR D/E (Pillar Retractor) | Storz N6750         | 1   |
| BASIN EMESIS EX SMALL (Kidney)                    |                     | 1   |
| CUP IODINE 6 OZ (Large, circular)                 | Pilling<br>471120   | 1   |
| PEERS NON-PEF TOWEL CLAMP                         | Pilling 12-<br>1650 | 1   |
| TISSUE TONSIL (Pickups)                           |                     | 1   |

Total 13

Confidential

## Appendix 1c – Extant Tray Composition Skin

| DESCRIPTION                                                    | CATALOG         | QTY |
|----------------------------------------------------------------|-----------------|-----|
| FCP ADSON 15CM 1 x 2 TOOTHED (Toothed Adsons)                  | Pilling 181223  | 2   |
| FCP ADSON SERRATED 4-3/4" (Non toothed Adsons)                 | Pilling 181220  | 1   |
| FCP ADSON TISSUE 5" 1.7MM TIP BROWN-TYPE TEETH (Adson Browns)  | Codman 30-1189  | 1   |
| CASTRO FCP STR JAW .5MM (Castros)                              | Storz E1798     | 1   |
| FCP CASTROVIEJO SUTURING (Castros w/ holes in handles)         | Katena K5-2510  | 1   |
| HOOK SKIN 2 PIECE (Short skin hook)                            |                 | 2   |
| HOOK GILLES SKIN LG 4MM (Longer skin hook)                     | Pilling 054130  | 2   |
| RETR SENN PRONG FINE SHARP (Senns)                             | Pilling 164750  | 2   |
| HOOK JOSEPH SKIN DBL 10MM (Wide double skin hook)              | Pilling 442108  | 2   |
| RETR RAGNELL D/E 5.75 (Ragnell)                                | Pilling 054600  | 2   |
| CUP IODINE 6 OZ (Big cup)                                      | Pilling 471120  | 1   |
| CUP MEDICINE 2 OZ (Small cup)                                  | Pilling 471115  | 2   |
| TUBE SUCTION FERG FRAZ 6FR SZ 0                                | Pilling 162410  | 1   |
| STYLETTE                                                       |                 | 1   |
| RETR BECKMAN-WEITLANER SHARP 5 1/2 (Self-retracting retractor) | Pilling 165370  | 1   |
| SCALPEL HANDLE BARRON # 3 (Cylindrical scalpel handle)         | Aesculap BB068R | 1   |
| HANDLE KNIFE STANDARD #3 (Normal scalpel handle)               | Pilling 352950  | 2   |
| FCP SPONGE STR SERR 9 1/2 (Sponge stick)                       | Pilling 121417  | 1   |
| SCISS MAYO STR BEV 6 3/4 (Mayos)                               | Pilling 141312  | 1   |
| SCISS METZ CVD 7 (Metz)                                        | Pilling 141462  | 1   |
| SCISS JAMISON METZ CVD 6 (TENOTOMY)                            | Pilling 342220  | 1   |
| NH CRILE WOOD FINE TC 6 (Small fine needle driver)             | Pilling 152780  | 1   |
| NH HALSEY 5 TC (Mini toothed driver)                           | Pilling 152800  | 1   |
| FCP ALLIS TISSUE 5 X 6 TEETH 6" REG WEIGHT (Allis)             | Pilling 182860  | 1   |
| FCP HALSTEAD MOSQ CVD 5 (Mosquito)                             | Pilling 182310  | 6   |
| SCISS STEVENS TENOTOMY CVD 4.4 (Curved Stevens)                | Pilling 144352  | 1   |
| SCISS STEVEN TENOTOMY STR 4.4 (Straight Stevens)               | Pilling 144350  | 1   |
| SCISS IRIS STR SS 4 1/2 (Sharpies)                             | Pilling 144300  | 1   |
| FCP BACKHAUS TOWEL 3 1/2 (Piercing towel clip)                 | Pilling 121605  | 2   |

Total

43

## Appendix 1d – Reduced Tray Composition Skin

| DESCRIPTION                                            | CATALOG         | QTY |
|--------------------------------------------------------|-----------------|-----|
| FCP ADSON 15CM 1 x 2 TOOTHED (Toothed Adsons)          | Pilling 181223  | 2   |
| CASTRO FCP STR JAW .5MM (Castros)                      | Storz E1798     | 1   |
| FCP CASTROVIEJO SUTURING (Castros w/ holes in handles) | Katena K5-2510  | 1   |
| HOOK GILLES SKIN LG 4MM (Longer skin hook)             | Pilling 054130  | 2   |
| HOOK JOSEPH SKIN DBL 10MM (Wide double skin hook)      | Pilling 442108  | 2   |
| CUP MEDICINE 2 OZ (Small cup)                          | Pilling 471115  | 2   |
| TUBE SUCTION FERG FRAZ 6FR SZ 0                        | Pilling 162410  | 1   |
| SCALPEL HANDLE BARRON # 3 (Cylindrical scalpel handle) | Aesculap BB068R | 1   |
| HANDLE KNIFE STANDARD #3 (Normal scalpel handle)       | Pilling 352950  | 2   |
| FCP SPONGE STR SERR 9 1/2 (Sponge stick)               | Pilling 121417  | 1   |
| SCISS MAYO STR BEV 6 3/4 (Mayos)                       | Pilling 141312  | 1   |
| NH CRILE WOOD FINE TC 6 (Small fine needle driver)     | Pilling 152780  | 1   |
| NH HALSEY 5 TC (Mini toothed driver)                   | Pilling 152800  | 1   |
| FCP ALLIS TISSUE 5 X 6 TEETH 6" REG WEIGHT (Allis)     | Pilling 182860  | 1   |
| SCISS STEVENS TENOTOMY CVD 4.4 (Curved Stevens)        | Pilling 144352  | 1   |
| SCISS STEVEN TENOTOMY STR 4.4 (Straight Stevens)       | Pilling 144350  | 1   |
| SCISS IRIS STR SS 4 1/2 (Sharpies)                     | Pilling 144300  | 1   |
| FCP BACKHAUS TOWEL 3 1/2 (Piercing towel clip)         | Pilling 121605  | 2   |
| FCP HALSTEAD MOSQ CVD 5 (Mosquito)                     | Pilling 182310  | 2   |
| FCP ADSON SERRATED 4-3/4" (Non toothed Adsons)         | Pilling 181220  | 1   |

Total

27

## Appendix 1e – Extant Tray Composition Sinus

| DESCRIPTION                            | CATALOG        | QTY |
|----------------------------------------|----------------|-----|
| COTTLE SEPTUM SPECULUM                 | Storz N2200    | 1   |
| CUP MEDICINE 2 OZ                      | Pilling 471115 | 1   |
| FCP LUCAE EAR DEL 5 1/2" (Bayonets)    | Storz N0900    | 1   |
| WIEDER TONGUE DEPRESSOR L (Sweetheart) | Storz N7332    | 1   |
| SCISS OPER STR S/S 5.5                 | Pilling 460140 | 1   |
| VIENNA NASAL SPEC. #1 (short)          | Storz N2121    | 1   |
| VIENNA NASAL SPEC. #3 (long)           | Storz N2123    | 1   |
| SUCTION CURVED # 10                    | Pilling 29304  | 1   |
| STYLETTE                               |                | 1   |
| SUCTION ANGLED # 8                     | Pilling 29302  | 1   |
| STYLETTE                               |                | 1   |
| SUCTION MALLEABLE # 1 (Curved Suction) | Storz N2486    | 1   |
| STYLETTE                               |                | 1   |
| FCP PEERS TOWEL 5 3/4 (Piercing clips) | Pilling 121650 | 1   |

| DESCRIPTION                                       | CATALOG           | QTY |
|---------------------------------------------------|-------------------|-----|
| PUNCH, BLUNTNOSE, 1.0 MM, STR                     | Acufex 012035     | 1   |
| FCP RHINO 451001-B (Straight Thru-cut)            |                   | 1   |
| FCP RHINO 451500-B (Upgoing thru-cut)             |                   | 1   |
| FCP RP5801 (Straight, small biopsies)             |                   | 1   |
| FCP RP5802 (Upgoing, small biopsies)              |                   | 1   |
| FCP BLAKESLEY STR #1 (Blakesley)                  | Karl Storz 456001 | 1   |
| ELEV GORNEY SEPTUM SUCTION (Suction elevator)     | Karl Storz 474001 | 1   |
| STYLETTE                                          |                   | 1   |
| SUCTION TUBE 4MM LONG CV (Big curved sucker)      | Karl Storz 586040 | 1   |
| SUCTION TUBE 2.5MM LONG C (Medium, curved sucker) | Karl Storz 586031 | 1   |
| SUCTION ANTRUM SMALL (Small, curved sucker)       |                   | 1   |
| PROBE D/E S.50.714 (Frontal probe)                |                   | 1   |
| OSTIUM SEEKER,MAX,BALLTIP (Ball probe)            | Karl Storz 629820 | 1   |
| ANTRUM CURETTE 1.5X6MM (Straight curette)         | Karl Storz 628702 | 1   |
| CURETTE,SM,OBLONG,45 DEG (J curette)              | Karl Storz 628714 | 1   |
| CURETTE,SM,OBLONG,90 DEG (90 degree J)            | Karl Storz 628712 | 1   |

| DESCRIPTION                           | CATALOG     | QTY |
|---------------------------------------|-------------|-----|
| ELEV NASAL FRACTURE BOIES (Persuader) | Storz N4655 | 1   |
| ENT MALLET (Hammer)                   |             | 1   |
| COTTLE SEPTUM SPECULUM                | Storz N2200 | 1   |



| DESCRIPTION                                            | CATALOG                   | QTY |
|--------------------------------------------------------|---------------------------|-----|
| VIENNA NASAL SPEC. #4                                  | Storz N2106               | 1   |
| WIEDER TONGUE DEPRESSOR S (Sweetheart)                 | Storz N7330               | 1   |
| FCP ADSON SERRATED 4-3/4" (Adsons)                     | Pilling 181220            | 1   |
| FCP BROWN TISSUE 9 X 9 4-3/4 (Adson Browns)            | Pilling 181235            | 1   |
| FCP ADSON 15CM 1 x 2 TOOTHED (Toothed Adsons)          | Pilling 181223            | 1   |
| FCP LUCAE EAR DEL 5 1/2" (Bayonets)                    | Storz N0900               | 2   |
| BUCK EAR CUR,DULL,#0 (Wax curette)                     | Storz N0400-0             | 1   |
| CUP MEDICINE 2 OZ (Cup)                                | Pilling 471115            | 3   |
| FCP SUCTION UP (suction forceps, upgoing)              |                           | 1   |
| FCP SUCTION STRAIGHT (suction forceps, straight)       |                           | 1   |
| BACK BITER PEADIATRIC                                  |                           | 1   |
| EAR SUCTION TUBING                                     |                           | 1   |
| JANSEN-MIDDLETON FCP.4X11 (Jansen-Middleton)           | Storz N3070               | 1   |
| Chuck Handle #3K, 10cm long (Beaver blade handle)      | Katena K20-1910           | 1   |
| SCALPEL HANDLE # 7 (Long, skinny scalpel handle)       | Pilling M36-16            | 1   |
| FREER ELEVATOR 7" D/E (Freer)                          | Storz N2348               | 1   |
| OSTEOTOME COTTLE 9MM                                   | Storz N4339               | 1   |
| OSTEOTOME COTTLE 6MM                                   | Storz N4337               | 1   |
| OSTEOTOME COTTLE 4MM                                   | Storz N4334               | 1   |
| ELEV HOWARTH (Howarth)                                 |                           | 1   |
| ELEV COTTLE STORZ (Cottle)                             | Storz N4660               | 1   |
| KNIFE COTTLE NASAL (Cottle knife)                      | Storz N4240               | 1   |
| RETR NEIVERT BALL TIP (2-ball retractor)               | Storz N4285               | 1   |
| HOOK GILLES SKIN LG 4MM (Skin hooks)                   | Pilling 054130            | 2   |
| SICKLE KNIFE 10MM CVD SNG                              | Storz N2909               | 1   |
| ballenger swivel knife                                 | Instrumentarium<br>477703 | 1   |
| suction freer                                          |                           | 1   |
| SUCTION ANGLED # 8                                     | Pilling 29302             | 1   |
| STYLETTE                                               |                           | 1   |
| SUCTION CURVED # 10                                    | Pilling 29304             | 1   |
| STYLETTE                                               |                           | 1   |
| SUCTION TUBE 4MM SHORT CV (shortest, 45 degree sucker) | Karl Storz 586240         | 1   |
| SUCTION TUBE 3MM LONG CV (medium, 90 degree sucker)    | Karl Storz 586030         | 1   |
| SUCTION TUBE 3MM SHORT CV (medium, gentler curve)      | Karl Storz 586230         | 1   |
| NH CRILE WOOD TC 7 (Needle driver)                     | Pilling 152782            | 1   |
| NH HALSEY 5 TC (short driver)                          | Pilling 152800            | 1   |
| FCP HALSTEAD MOSQ CVD 5 (Curved mosequito)             | Pilling 182310            | 2   |
| FCP BACKHAUS TOWEL 5 1/2 (piercing towel clip)         | Pilling 121600            | 2   |
| FCP PEERS TOWEL 5 3/4 (Non piercing clip)              | Pilling 121650            | 5   |
| SCISS MAYO STR BEV 6 3/4 (Mayos)                       | Pilling 141312            | 1   |

| DESCRIPTION                                             | CATALOG           | QTY |
|---------------------------------------------------------|-------------------|-----|
| SCISS METZ CVD 5 3/4" REG (Metz)                        | Pilling 142200    | 1   |
| SCISS STEVENS TENOTOMY CVD 4.4 (Curved short stevens)   | Pilling 144352    | 1   |
| SCISS FOMON LOWER LAT CVD 5.0 (medium, curved scissors) | Pilling 056360    | 1   |
| SCISS EYE CVD 4 (sharpies)                              | Pilling 423434    | 1   |
| SCISS KNIGHT NASAL MED WT (Septal scissors)             | Storz N2886       | 1   |
| SCISS NASAL RT 11MM BLADES (Endoscopic scissors, Right) | Karl Storz 449202 | 1   |
| SCISS NASAL LFT 11MM BLADES (Endoscopic scissors, Left) | Karl Storz 449203 | 1   |
| SCISS NASAL STR 11MM BLADES (Endoscopic Scissors)       | Karl Storz 449201 | 1   |
| FCP BLAKESLEY UP #0 (Upgoing Blakesley)                 | Karl Storz 457000 | 1   |
| BLAKESLEY FCP 90' UP 4X10 (90 degree Blakesley)         | Karl Storz 456801 | 1   |
| OST ANT PNCH LF SIDE CUT (Left punch)                   | Karl Storz 459012 | 1   |
| OST ANT PNCH RT SIDE CUT (Right punch)                  | Karl Storz 459011 | 1   |
| OST ANT PNCH BCK 3MMX7MM (Straight punch)               | Karl Storz 459010 | 1   |
| FCP WILDE NASAL STR (Wildes)                            | Storz N2980       | 1   |
| FCP WEIL NASAL.STR.ROUND (Weil)                         | Storz N2974       | 1   |
| FCP BIOPSY STR DOUBLE SPOON 9" (Spoon nasal biopsy)     | Karl Storz 723030 | 1   |
| FCP GRASPING HEUWIESER ANTRUM 5.1" (Heuwieser)          | Xomed 3711071     | 1   |

Total

100

## Appendix 1f – Reduced Tray Composition Sinus

| DESCRIPTION                                       | CATALOG              | QTY |
|---------------------------------------------------|----------------------|-----|
| COTTLE SEPTUM SPECULUM                            | Storz N2200          | 1   |
| CUP MEDICINE 2 OZ                                 | Pilling 471115       | 1   |
| FCP LUCAE EAR DEL 5 1/2" (Bayonets)               | Storz N0900          | 1   |
| VIENNA NASAL SPEC. #1 (short)                     | Storz N2121          | 1   |
| VIENNA NASAL SPEC. #3 (long)                      | Storz N2123          | 1   |
| FCP RHINO 451001-B (Straight Thru-cut)            |                      | 1   |
| FCP RHINO 451500-B (Upgoing thru-cut)             |                      | 1   |
| FCP BLAKESLEY STR #1 (Blakesley)                  | Karl Storz<br>456001 | 1   |
| SUCTION TUBE 4MM LONG CV (Big curved sucker)      | Karl Storz<br>586040 | 1   |
| SUCTION TUBE 2.5MM LONG C (Medium, curved sucker) | Karl Storz<br>586031 | 1   |
| SUCTION ANTRUM SMALL (Small, curved sucker)       |                      | 1   |
| PROBE D/E S.50.714 (Frontal probe)                |                      | 1   |
| OSTIUM SEEKER,MAX,BALLTIP (Ball probe)            | Karl Storz<br>629820 | 1   |
| ANTRUM CURETTE 1.5X6MM (Straight curette)         | Karl Storz<br>628702 | 1   |
| CURETTE,SM,OBLONG,45 DEG (J curette)              | Karl Storz<br>628714 | 1   |
| CURETTE,SM,OBLONG,90 DEG (90 degree J)            | Karl Storz<br>628712 | 1   |
| ELEV NASAL FRACTURE BOIES (Persuader)             | Storz N4655          | 1   |
| FCP LUCAE EAR DEL 5 1/2" (Bayonetts)              | Storz N0900          | 2   |
| CUP MEDICINE 2 OZ (Cup)                           | Pilling 471115       | 3   |
| BACK BITER PEADIATRIC                             |                      | 1   |
| ELEV COTTLE STORZ (Cottle)                        | Storz N4660          | 1   |
| SUCTION ANGLED # 8                                | Pilling 29302        | 1   |
| SUCTION CURVED # 10                               | Pilling 29304        | 1   |
| FCP BACKHAUS TOWEL 5 1/2 (piercing towel clip)    | Pilling 121600       | 2   |
| FCP PEERS TOWEL 5 3/4 (Non piercing clip)         | Pilling 121650       | 5   |
| SCISS MAYO STR BEV 6 3/4 (Mayos)                  | Pilling 141312       | 1   |
| FCP BLAKESLEY UP #0 (Upgoing Blakesley)           | Karl Storz<br>457000 | 1   |
| BLAKESLEY FCP 90' UP 4X10 (90 degree Blakesley)   | Karl Storz<br>456801 | 1   |

Total

36

## Appendix 1g – Extant Tray Composition Septoplasty

| DESCRIPTION                            | CATALOG        | QTY |
|----------------------------------------|----------------|-----|
| COTTLE SEPTUM SPECULUM                 | Storz N2200    | 1   |
| CUP MEDICINE 2 OZ                      | Pilling 471115 | 1   |
| FCP LUCAE EAR DEL 5 1/2" (Bayonets)    | Storz N0900    | 1   |
| WIEDER TONGUE DEPRESSOR L (Sweetheart) | Storz N7332    | 1   |
| SCISS OPER STR S/S 5.5                 | Pilling 460140 | 1   |
| VIENNA NASAL SPEC. #1 (short)          | Storz N2121    | 1   |
| VIENNA NASAL SPEC. #3 (long)           | Storz N2123    | 1   |
| SUCTION CURVED # 10                    | Pilling 29304  | 1   |
| STYLETTE                               |                | 1   |
| SUCTION ANGLED # 8                     | Pilling 29302  | 1   |
| STYLETTE                               |                | 1   |
| SUCTION MALLEABLE # 1 (Curved Suction) | Storz N2486    | 1   |
| STYLETTE                               |                | 1   |
| FCP PEERS TOWEL 5 3/4 (Piercing clips) | Pilling 121650 | 1   |

| DESCRIPTION                                       | CATALOG         | QTY |
|---------------------------------------------------|-----------------|-----|
| ELEV NASAL FRACTURE BOIES (Persuader)             | Storz N4655     | 1   |
| ENT Mallet (Hammer)                               |                 | 1   |
| COTTLE SEPTUM SPECULUM                            | Storz N2200     | 1   |
| VIENNA NASAL SPEC. #4                             | Storz N2106     | 1   |
| WIEDER TONGUE DEPRESSOR S (Sweetheart)            | Storz N7330     | 1   |
| FCP ADSON SERRATED 4-3/4" (Adsons)                | Pilling 181220  | 1   |
| FCP BROWN TISSUE 9 X 9 4-3/4 (Adson Browns)       | Pilling 181235  | 1   |
| FCP ADSON 15CM 1 x 2 TOOTHED (Toothed Adsons)     | Pilling 181223  | 1   |
| FCP LUCAE EAR DEL 5 1/2" (Bayonets)               | Storz N0900     | 2   |
| BUCK EAR CUR,DULL,#0 (Wax curette)                | Storz N0400-0   | 1   |
| CUP MEDICINE 2 OZ (Cup)                           | Pilling 471115  | 3   |
| FCP SUCTION UP (suction forceps, upgoing)         |                 | 1   |
| FCP SUCTION STRAIGHT (suction forceps, straight)  |                 | 1   |
| BACK BITER PEADIATRIC                             |                 | 1   |
| EAR SUCTION TUBING                                |                 | 1   |
| JANSEN-MIDDLETON FCP.4X11 (Jansen-Middleton)      | Storz N3070     | 1   |
| Chuck Handle #3K, 10cm long (Beaver blade handle) | Katena K20-1910 | 1   |
| SCALPEL HANDLE # 7 (Long, skinny scalpel handle)  | Pilling M36-16  | 1   |
| FREER ELEVATOR 7" D/E (Freer)                     | Storz N2348     | 1   |
| OSTEOTOME COTTLE 9MM                              | Storz N4339     | 1   |
| OSTEOTOME COTTLE 6MM                              | Storz N4337     | 1   |
| OSTEOTOME COTTLE 4MM                              | Storz N4334     | 1   |

| DESCRIPTION                                             | CATALOG                   | QTY |
|---------------------------------------------------------|---------------------------|-----|
| ELEV HOWARTH (Howarth)                                  |                           | 1   |
| ELEV COTTLE STORZ (Cottle)                              | Storz N4660               | 1   |
| KNIFE COTTLE NASAL (Cottle knife)                       | Storz N4240               | 1   |
| RETR NEIVERT BALL TIP (2-ball retractor)                | Storz N4285               | 1   |
| HOOK GILLES SKIN LG 4MM (Skin hooks)                    | Pilling 054130            | 2   |
| SICKLE KNIFE 10MM CVD SNG                               | Storz N2909               | 1   |
| ballenger swivel knife                                  | Instrumentarium<br>477703 | 1   |
| suction freer                                           |                           | 1   |
| SUCTION ANGLED # 8                                      | Pilling 29302             | 1   |
| STYLETTE                                                |                           | 1   |
| SUCTION CURVED # 10                                     | Pilling 29304             | 1   |
| STYLETTE                                                |                           | 1   |
| SUCTION TUBE 4MM SHORT CV (shortest, 45 degree sucker)  | Karl Storz 586240         | 1   |
| SUCTION TUBE 3MM LONG CV (medium, 90 degree sucker)     | Karl Storz 586030         | 1   |
| SUCTION TUBE 3MM SHORT CV (medium, gentler curve)       | Karl Storz 586230         | 1   |
| NH CRILE WOOD TC 7 (Needle driver)                      | Pilling 152782            | 1   |
| NH HALSEY 5 TC (short driver)                           | Pilling 152800            | 1   |
| FCP HALSTEAD MOSQ CVD 5 (Curved mosequito)              | Pilling 182310            | 2   |
| FCP BACKHAUS TOWEL 5 1/2 (piercing towel clip)          | Pilling 121600            | 2   |
| FCP PEERS TOWEL 5 3/4 (Non piercing clip)               | Pilling 121650            | 5   |
| SCISS MAYO STR BEV 6 3/4 (Mayos)                        | Pilling 141312            | 1   |
| SCISS METZ CVD 5 3/4" REG (Metz)                        | Pilling 142200            | 1   |
| SCISS STEVENS TENOTOMY CVD 4.4 (Curved short stevens)   | Pilling 144352            | 1   |
| SCISS FOMON LOWER LAT CVD 5.0 (medium, curved scissors) | Pilling 056360            | 1   |
| SCISS EYE CVD 4 (sharpies)                              | Pilling 423434            | 1   |
| SCISS KNIGHT NASAL MED WT (Septal scissors)             | Storz N2886               | 1   |
| SCISS NASAL RT 11MM BLADES (Endoscopic scissors, Right) | Karl Storz 449202         | 1   |
| SCISS NASAL LFT 11MM BLADES (Endoscopic scissors, Left) | Karl Storz 449203         | 1   |
| SCISS NASAL STR 11MM BLADES (Endoscopic Scissors)       | Karl Storz 449201         | 1   |
| FCP BLAKESLEY UP #0 (Upgoing Blakesley)                 | Karl Storz 457000         | 1   |
| BLAKESLEY FCP 90' UP 4X10 (90 degree Blakesley)         | Karl Storz 456801         | 1   |
| OST ANT PNCH LF SIDE CUT (Left punch)                   | Karl Storz 459012         | 1   |
| OST ANT PNCH RT SIDE CUT (Right punch)                  | Karl Storz 459011         | 1   |
| OST ANT PNCH BCK 3MMX7MM (Straight punch)               | Karl Storz 459010         | 1   |
| FCP WILDE NASAL STR (Wildes)                            | Storz N2980               | 1   |
| FCP WEIL NASAL.STR.ROUND (Weil)                         | Storz N2974               | 1   |
| FCP BIOPSY STR DOUBLE SPOON 9" (Spoon nasal biopsy)     | Karl Storz 723030         | 1   |
| FCP GRASPING HEUWIESER ANTRUM 5.1" (Heuwieser)          | Xomed 3711071             | 1   |

Total

84

## Appendix 1h – Reduced Tray Composition Septoplasty

| DESCRIPTION                                             | CATALOG         | QTY |
|---------------------------------------------------------|-----------------|-----|
| COTTLE SEPTUM SPECULUM                                  | Storz N2200     | 1   |
| CUP MEDICINE 2 OZ                                       | Pilling 471115  | 1   |
| FCP LUCAE EAR DEL 5 1/2" (Bayonets)                     | Storz N0900     | 1   |
| VIENNA NASAL SPEC. #1 (short)                           | Storz N2121     | 1   |
| VIENNA NASAL SPEC. #3 (long)                            | Storz N2123     | 1   |
| ELEV NASAL FRACTURE BOIES (Persuader)                   | Storz N4655     | 1   |
| VIENNA NASAL SPEC. #4                                   | Storz N2106     | 1   |
| FCP ADSON 15CM 1 x 2 TOOTHED (Toothed Adsons)           | Pilling 181223  | 1   |
| FCP LUCAE EAR DEL 5 1/2" (Bayonets)                     | Storz N0900     | 2   |
| CUP MEDICINE 2 OZ (Cup)                                 | Pilling 471115  | 3   |
| SCALPEL HANDLE # 7 (Long, skinny scalpel handle)        | Pilling M36-16  | 1   |
| ELEV COTTLE STORZ (Cottle)                              | Storz N4660     | 1   |
| KNIFE COTTLE NASAL (Cottle knife)                       | Storz N4240     | 1   |
| SUCTION ANGLED # 8                                      | Pilling 29302   | 1   |
| NH CRILE WOOD TC 7 (Needle driver)                      | Pilling 152782  | 1   |
| NH HALSEY 5 TC (short driver)                           | Pilling 152800  | 1   |
| FCP BACKHAUS TOWEL 5 1/2 (piercing towel clip)          | Pilling 121600  | 2   |
| FCP PEERS TOWEL 5 3/4 (Non piercing clip)               | Pilling 121650  | 5   |
| SCISS MAYO STR BEV 6 3/4 (Mayos)                        | Pilling 141312  | 1   |
| SCISS FOMON LOWER LAT CVD 5.0 (medium, curved scissors) | Pilling 056360  | 1   |
| SCISS KNIGHT NASAL MED WT (Septal scissors)             | Storz N2886     | 1   |
| FCP WILDE NASAL STR (Wildes)                            | Storz N2980     | 1   |
| WIEDER TONGUE DEPRESSOR S (Sweetheart)                  | Storz N7330     | 1   |
| Chuck Handle #3K, 10cm long (Beaver blade handle)       | Katena K20-1910 | 1   |
| JANSEN-MIDDLETON FCP.4X11 (Jansen-Middleton)            | Storz N3070     | 1   |

Total

33

## Appendix 1i – Extant Tray Composition Septorhinoplasty

| DESCRIPTION                            | CATALOG        | QTY |
|----------------------------------------|----------------|-----|
| COTTLE SEPTUM SPECULUM                 | Storz N2200    | 1   |
| CUP MEDICINE 2 OZ                      | Pilling 471115 | 1   |
| FCP LUCAE EAR DEL 5 1/2" (Bayonets)    | Storz N0900    | 1   |
| WIEDER TONGUE DEPRESSOR L (Sweetheart) | Storz N7332    | 1   |
| SCISS OPER STR S/S 5.5                 | Pilling 460140 | 1   |
| VIENNA NASAL SPEC. #1 (short)          | Storz N2121    | 1   |
| VIENNA NASAL SPEC. #3 (long)           | Storz N2123    | 1   |
| SUCTION CURVED # 10                    | Pilling 29304  | 1   |
| STYLETTE                               |                | 1   |
| SUCTION ANGLED # 8                     | Pilling 29302  | 1   |
| STYLETTE                               |                | 1   |
| SUCTION MALLEABLE # 1 (Curved Suction) | Storz N2486    | 1   |
| STYLETTE                               |                | 1   |
| FCP PEERS TOWEL 5 3/4 (Piercing clips) | Pilling 121650 | 1   |

| DESCRIPTION                                       | CATALOG         | QTY |
|---------------------------------------------------|-----------------|-----|
| ELEV NASAL FRACTURE BOIES (Persuader)             | Storz N4655     | 1   |
| ENT Mallet (Hammer)                               |                 | 1   |
| COTTLE SEPTUM SPECULUM                            | Storz N2200     | 1   |
| VIENNA NASAL SPEC. #4                             | Storz N2106     | 1   |
| WIEDER TONGUE DEPRESSOR S (Sweetheart)            | Storz N7330     | 1   |
| FCP ADSON SERRATED 4-3/4" (Adsons)                | Pilling 181220  | 1   |
| FCP BROWN TISSUE 9 X 9 4-3/4 (Adson Browns)       | Pilling 181235  | 1   |
| FCP ADSON 15CM 1 x 2 TOOTHED (Toothed Adsons)     | Pilling 181223  | 1   |
| FCP LUCAE EAR DEL 5 1/2" (Bayonets)               | Storz N0900     | 2   |
| BUCK EAR CUR,DULL,#0 (Wax curette)                | Storz N0400-0   | 1   |
| CUP MEDICINE 2 OZ (Cup)                           | Pilling 471115  | 3   |
| FCP SUCTION UP (suction forceps, upgoing)         |                 | 1   |
| FCP SUCTION STRAIGHT (suction forceps, straight)  |                 | 1   |
| BACK BITER PEADIATRIC                             |                 | 1   |
| EAR SUCTION TUBING                                |                 | 1   |
| JANSEN-MIDDLETON FCP.4X11 (Jansen-Middleton)      | Storz N3070     | 1   |
| Chuck Handle #3K, 10cm long (Beaver blade handle) | Katena K20-1910 | 1   |
| SCALPEL HANDLE # 7 (Long, skinny scalpel handle)  | Pilling M36-16  | 1   |
| FREER ELEVATOR 7" D/E (Freer)                     | Storz N2348     | 1   |
| OSTEOTOME COTTLE 9MM                              | Storz N4339     | 1   |
| OSTEOTOME COTTLE 6MM                              | Storz N4337     | 1   |
| OSTEOTOME COTTLE 4MM                              | Storz N4334     | 1   |

| DESCRIPTION                                             | CATALOG                   | QTY |
|---------------------------------------------------------|---------------------------|-----|
| ELEV HOWARTH (Howarth)                                  |                           | 1   |
| ELEV COTTLE STORZ (Cottle)                              | Storz N4660               | 1   |
| KNIFE COTTLE NASAL (Cottle knife)                       | Storz N4240               | 1   |
| RETR NEIVERT BALL TIP (2-ball retractor)                | Storz N4285               | 1   |
| HOOK GILLES SKIN LG 4MM (Skin hooks)                    | Pilling 054130            | 2   |
| SICKLE KNIFE 10MM CVD SNG                               | Storz N2909               | 1   |
| ballenger swivel knife                                  | Instrumentarium<br>477703 | 1   |
| suction freer                                           |                           | 1   |
| SUCTION ANGLED # 8                                      | Pilling 29302             | 1   |
| STYLETTE                                                |                           | 1   |
| SUCTION CURVED # 10                                     | Pilling 29304             | 1   |
| STYLETTE                                                |                           | 1   |
| SUCTION TUBE 4MM SHORT CV (shortest, 45 degree sucker)  | Karl Storz 586240         | 1   |
| SUCTION TUBE 3MM LONG CV (medium, 90 degree sucker)     | Karl Storz 586030         | 1   |
| SUCTION TUBE 3MM SHORT CV (medium, gentler curve)       | Karl Storz 586230         | 1   |
| NH CRILE WOOD TC 7 (Needle driver)                      | Pilling 152782            | 1   |
| NH HALSEY 5 TC (short driver)                           | Pilling 152800            | 1   |
| FCP HALSTEAD MOSQ CVD 5 (Curved mosequito)              | Pilling 182310            | 2   |
| FCP BACKHAUS TOWEL 5 1/2 (piercing towel clip)          | Pilling 121600            | 2   |
| FCP PEERS TOWEL 5 3/4 (Non piercing clip)               | Pilling 121650            | 5   |
| SCISS MAYO STR BEV 6 3/4 (Mayos)                        | Pilling 141312            | 1   |
| SCISS METZ CVD 5 3/4" REG (Metz)                        | Pilling 142200            | 1   |
| SCISS STEVENS TENOTOMY CVD 4.4 (Curved short stevens)   | Pilling 144352            | 1   |
| SCISS FOMON LOWER LAT CVD 5.0 (medium, curved scissors) | Pilling 056360            | 1   |
| SCISS EYE CVD 4 (sharpies)                              | Pilling 423434            | 1   |
| SCISS KNIGHT NASAL MED WT (Septal scissors)             | Storz N2886               | 1   |
| SCISS NASAL RT 11MM BLADES (Endoscopic scissors, Right) | Karl Storz 449202         | 1   |
| SCISS NASAL LFT 11MM BLADES (Endoscopic scissors, Left) | Karl Storz 449203         | 1   |
| SCISS NASAL STR 11MM BLADES (Endoscopic Scissors)       | Karl Storz 449201         | 1   |
| FCP BLAKESLEY UP #0 (Upgoing Blakesley)                 | Karl Storz 457000         | 1   |
| BLAKESLEY FCP 90' UP 4X10 (90 degree Blakesley)         | Karl Storz 456801         | 1   |
| OST ANT PNCH LF SIDE CUT (Left punch)                   | Karl Storz 459012         | 1   |
| OST ANT PNCH RT SIDE CUT (Right punch)                  | Karl Storz 459011         | 1   |
| OST ANT PNCH BCK 3MMX7MM (Straight punch)               | Karl Storz 459010         | 1   |
| FCP WILDE NASAL STR (Wildes)                            | Storz N2980               | 1   |
| FCP WEIL NASAL.STR.ROUND (Weil)                         | Storz N2974               | 1   |
| FCP BIOPSY STR DOUBLE SPOON 9" (Spoon nasal biopsy)     | Karl Storz 723030         | 1   |
| FCP GRASPING HEUWIESER ANTRUM 5.1" (Heuwieser)          | Xomed 3711071             | 1   |



| DESCRIPTION                                                               | CATALOG                    | QTY |
|---------------------------------------------------------------------------|----------------------------|-----|
| SCISS COTTLE DORSAL (Cottle Scissors)                                     | Medtronic 37-13002         | 1   |
| MALLET COTTLE (Mallet)                                                    | Medtronic 37-14353         | 1   |
| ELEV NASAL FRACTURE BOIES (Persuader)                                     | Storz N4655                | 1   |
| RONG KK D/A LT CVD LRG (Medium rongeur)                                   | Pilling 065212             | 1   |
| RONG LEMPert 6 STR 3 X 7MM (Lempert rongeur)                              | K-Medic KM47-258           | 1   |
| SUCTION ANGLED # 8                                                        | Pilling 29302              | 1   |
| Converse (Converse retractor)                                             | Xomed 3714472              | 1   |
| CASTRO NH STR DEL W/LOCK (Castro driver with locking handle)              | Weck 004130                | 1   |
| RETR COTTLE ALAR (Alar retractor, smooth)                                 | Medtronic 37-14187         | 1   |
| SPEC NASAL COTTLE 50MM (Nasal Speculum)                                   | Xomed 3714472              | 1   |
| FCP PEERS TOWEL 5 3/4 (Non piercing towel clips)                          | Pilling 121650             | 2   |
| BACKHAUS TOWEL CLIP 5 1/2 (Piercing towel clips)                          | Pilling 12-1600            | 4   |
| FCP ROCH-PEAN HEMOSTAT CVD 6 1/4 (Curved Kelly)                           | Pilling 182445             | 1   |
| NH HALSEY SMOOTH 5 TC (Small needle drive)                                | Pilling 152802             | 2   |
| NH RYDER 1MM JAW 5 TC (Needle driver with black handle)                   | Pilling 354990             | 1   |
| OSTEO LAMBOTTE-TYPE CVD 6.4MM (Long, curved osteo)                        | Zimmer 282-01              | 1   |
| OSTEOTOME 3MM                                                             | Medtronic 37-14060         | 1   |
| Osteotome Cur #5 Right                                                    | Xomed 3714090              | 1   |
| Osteotome Cur #5 left                                                     | Xomed 3714091              | 1   |
| OSTEOTOME RUBIN 10MM EDGE                                                 | Medtronic 37-14075         | 1   |
| OSTEOTOME RUBIN 12MM EDGE                                                 | Xomed 3714076              | 1   |
| OSTEOTOME COTTLE 6MM                                                      | Storz N4337                | 1   |
| OSTEOTOME BECKER SINGLE GUARD 3MM                                         | Medtronic CP313-1          | 1   |
| ELEV FREER SEPTUM 4.5MM (Freer elevator)                                  | Medtronic 37-14038         | 1   |
| Rasp Fomon Dble End fine                                                  | Xomed 3714148              | 1   |
| Rasp Fomon Dble End Coarse                                                | Xomed 3714149              | 1   |
| Elevator Cottle Skin (Cottle, thicker, shorter)                           | Xomed 3714126              | 1   |
| ELEV COTTLE STORZ (Cottle elevator, longer, normal)                       | Storz N4660                | 1   |
| KNIFE COTTLE NASAL (Cottle Knife)                                         | Storz N4240                | 1   |
| SCISS STICH SHARP POINT (Sharp pointed short scissors)                    | Medtronic 37-41033         | 1   |
| SCISSOR STEVENS CURVED (Curved stevens, short)                            | Xomed 3741036              | 3   |
| SCISS BECKER CONVERSE SERRATED (Sharp pointed, curved)                    | Medtronic CP1106           | 1   |
| SCISS IRIS STR SS 4 1/2 (Sharpie scissors)                                | Pilling 144300             | 1   |
| TISSUE BISHOP HARMS THD (Small pickups, size of Castros, teeth interlock) | Ocutek 3257                | 1   |
| FCP CATROVIEJO SUTURE 4 1 X 2 0.5MM (Castro pickups)                      | K-Medic KM53-456           | 2   |
| FCP BROWN TISSUE 9 X 9 4-3/4 (Adson Browns)                               | Pilling 181235             | 1   |
| FCP ADSON 15CM 1 x 2 TOOTHED (Toothed Adsons)                             | Pilling 181223             | 1   |
| FCP BAYONET (Bayonets)                                                    | Instrumentarium<br>PL.5565 | 1   |
| SCISS MAYO STR BEV 6 3/4 (Mayos)                                          | Pilling 141312             | 1   |

| DESCRIPTION                                     | CATALOG            | QTY |
|-------------------------------------------------|--------------------|-----|
| ELEV JOSEPH PERIOSTEAL (Periosteal)             | Medtronic 37-14125 | 1   |
| HOOK COTTLE SKIN DEEP CURVE SMALL (Single hook) | Medtronic 37-14108 | 2   |
| HOOK JOSEPH SKIN DBL 2MM (Wide double)          | Medtronic 37-14020 | 2   |
| HOOK JOSEPH SKIN DBL 10MM (Narrow double)       | Medtronic 37-14023 | 2   |
| RETR RAGNELL D/E 5.75 (Ragnell)                 | Pilling 054600     | 2   |
| HANDLE KNIFE STANDARD #3 (Normal handle)        | Pilling 352950     | 1   |
| KNIFE HANDLE BARRON (Cylindrical handle)        | Downs HG-275-05-G  | 1   |

Total

142

Confidential

## Appendix 1j – Reduced Tray Composition Septorhinoplasty

| DESCRIPTION                                                               | CATALOG            | QTY |
|---------------------------------------------------------------------------|--------------------|-----|
| COTTLE SEPTUM SPECULUM                                                    | Storz N2200        | 1   |
| CUP MEDICINE 2 OZ                                                         | Pilling 471115     | 1   |
| FCP LUCAE EAR DEL 5 1/2" (Bayonets)                                       | Storz N0900        | 1   |
| VIENNA NASAL SPEC. #1 (short)                                             | Storz N2121        | 1   |
| VIENNA NASAL SPEC. #3 (long)                                              | Storz N2123        | 1   |
| FCP LUCAE EAR DEL 5 1/2" (Bayonets)                                       | Storz N0900        | 2   |
| CUP MEDICINE 2 OZ (Cup)                                                   | Pilling 471115     | 3   |
| OSTEOTOME COTTLE 6MM                                                      | Storz N4337        | 1   |
| HOOK GILLES SKIN LG 4MM (Skin hooks)                                      | Pilling 054130     | 2   |
| SCISS KNIGHT NASAL MED WT (Septal scissors)                               | Storz N2886        | 1   |
| FCP WILDE NASAL STR (Wildes)                                              | Storz N2980        | 1   |
| MALLET COTTLE (Mallet)                                                    | Medtronic 37-14353 | 1   |
| ELEV NASAL FRACTURE BOIES (Persuader)                                     | Storz N4655        | 1   |
| SUCTION ANGLED # 8                                                        | Pilling 29302      | 1   |
| Converse (Converse retractor)                                             | Xomed 3714472      | 1   |
| SPEC NASAL COTTLE 50MM (Nasal Speculum)                                   | Xomed 3714472      | 1   |
| FCP PEERS TOWEL 5 3/4 (Non piercing towel clips)                          | Pilling 121650     | 2   |
| BACKHAUS TOWEL CLIP 5 1/2 (Piercing towel clips)                          | Pilling 12-1600    | 4   |
| NH HALSEY SMOOTH 5 TC (Small needle drive)                                | Pilling 152802     | 2   |
| Osteotome Cur #5 Right                                                    | Xomed 3714090      | 1   |
| Osteotome Cur #5 left                                                     | Xomed 3714091      | 1   |
| OSTEOTOME RUBIN 10MM EDGE                                                 | Medtronic 37-14075 | 1   |
| OSTEOTOME COTTLE 6MM                                                      | Storz N4337        | 1   |
| Rasp Fomon Dble End fine                                                  | Xomed 3714148      | 1   |
| Rasp Fomon Dble End Coarse                                                | Xomed 3714149      | 1   |
| ELEV COTTLE STORZ (Cottle elevator, longer, normal)                       | Storz N4660        | 1   |
| KNIFE COTTLE NASAL (Cottle Knife)                                         | Storz N4240        | 1   |
| SCISS STICH SHARP POINT (Sharp pointed short scissors)                    | Medtronic 37-41033 | 1   |
| SCISSOR STEVENS CURVED (Curved stevens, short)                            | Xomed 3741036      | 3   |
| SCISS IRIS STR SS 4 1/2 (Sharpie scissors)                                | Pilling 144300     | 1   |
| TISSUE BISHOP HARMS THD (Small pickups, size of Castros, teeth interlock) | Ocutek 3257        | 1   |
| FCP CATROVIEJO SUTURE 4 1 X 2 0.5MM (Castro pickups)                      | K-Medic KM53-456   | 2   |
| FCP BROWN TISSUE 9 X 9 4-3/4 (Adson Browns)                               | Pilling 181235     | 1   |
| FCP ADSON 15CM 1 x 2 TOOTHED (Toothed Adsons)                             | Pilling 181223     | 1   |
| SCISS MAYO STR BEV 6 3/4 (Mayos)                                          | Pilling 141312     | 1   |

| DESCRIPTION                                       | CATALOG            | QTY |
|---------------------------------------------------|--------------------|-----|
| HOOK COTTLE SKIN DEEP CURVE SMALL (Single hook)   | Medtronic 37-14108 | 2   |
| HOOK JOSEPH SKIN DBL 2MM (Wide double)            | Medtronic 37-14020 | 2   |
| HOOK JOSEPH SKIN DBL 10MM (Narrow double)         | Medtronic 37-14023 | 2   |
| RETR RAGNELL D/E 5.75 (Ragnell)                   | Pilling 054600     | 2   |
| HANDLE KNIFE STANDARD #3 (Normal handle)          | Pilling 352950     | 1   |
| KNIFE HANDLE BARRON (Cylindrical handle)          | Downs HG-275-05-G  | 1   |
| WIEDER TONGUE DEPRESSOR S (Sweetheart)            | Storz N7330        | 1   |
| Chuck Handle #3K, 10cm long (Beaver blade handle) | Katena K20-1910    | 1   |
| JANSEN-MIDDLETON FCP.4X11 (Jansen-Middleton)      | Storz N3070        | 1   |

Total

60

Confidential
